1 **A baton-relay and proofreading mechanism for selective ER retrieval signal**  
2 **capture by the KDEL receptor**

3

4 Andreas Gerondopoulos<sup>1,#</sup>, Philipp Bräuer<sup>1,#</sup>, Tomoaki Sobajima<sup>1</sup>, Zhiyi Wu<sup>1</sup>, Joanne  
5 L. Parker<sup>1</sup>, Philip C. Biggin<sup>1</sup>, Francis A. Barr<sup>1,\*</sup> and Simon Newstead<sup>1,\*</sup>.

6

7 <sup>1</sup>Department of Biochemistry, University of Oxford, South Parks Road OX1 3QU.

8 #these authors contributed equally to this work.

9

10 \*Correspondence [francis.barr@bioch.ox.ac.uk](mailto:francis.barr@bioch.ox.ac.uk), [simon.newstead@bioch.ox.ac.uk](mailto:simon.newstead@bioch.ox.ac.uk)

11

12 **Keywords:** Endoplasmic reticulum, Golgi, ER retrieval, cargo receptor.

13 **Running title:** ER retrieval signal capture and proofreading

14 **Manuscript:** 18<sup>th</sup> March 2021

15

16 **ABSTRACT**

17 The KDEL-retrieval pathway captures escaped ER proteins with a KDEL or variant  
18 C-terminal signal at acidic pH in the Golgi and releases them at neutral pH in the ER.  
19 To address the mechanism of signal binding and the molecular basis for differences  
20 in signal affinity, we determined the HDEL and RDEL bound structures of the KDEL-  
21 receptor. Affinity differences are explained by interactions between the variable -4  
22 position of the signal and W120, whereas initial capture of retrieval signals by their  
23 carboxyl-terminus is mediated by a baton-relay mechanism involving a series of  
24 conserved arginine residues in the receptor. This explains how the signal is first  
25 captured and then pulled into the binding cavity. During capture, retrieval signals  
26 undergo a selective proofreading step involving two gatekeeper residues D50 and  
27 E117 in the receptor. These mechanisms operate upstream of the pH-dependent  
28 closure of the receptor and explain the selectivity of the KDEL-retrieval pathway.

29  
30 **INTRODUCTION**

31 Stable maintenance of the luminal composition of the endoplasmic reticulum (ER) is  
32 crucial for the function of the secretory pathway (Ellgaard and Helenius, 2003).  
33 Because of the continuous flow of material from the ER to the Golgi, the essential  
34 chaperones and redox enzymes needed for protein folding in the ER lumen undergo  
35 dynamic retrieval from the Golgi apparatus (Gomez-Navarro and Miller, 2016).  
36 Conversely, secretory proteins destined for secretion and integral membrane  
37 proteins intended for other cellular compartments are not retained. This separation of  
38 secreted and retained cargo proteins involves signal-mediated sorting, whereby  
39 folded proteins destined for exit from the ER have active transport or exit signals,  
40 and proteins to be retained in the ER have signals for retrieval (Barlowe, 2003;  
41 Gomez-Navarro and Miller, 2016). For membrane proteins, cytoplasmic signals can

42 directly engage with the selective vesicle coat complexes required for transport  
43 between the ER and Golgi. For luminal proteins, this information has to be relayed  
44 by a transmembrane receptor that serves as an intermediary to the cytoplasmic coat  
45 protein complexes (Dancourt and Barlowe, 2010). In the archetypal KDEL-retrieval  
46 system, a 7-transmembrane receptor captures escaped ER luminal proteins carrying  
47 a C-terminal KDEL or variant tetrapeptide sequence in the acidic pH of the Golgi  
48 (Munro and Pelham, 1987; Semenza et al., 1990). Signal binding to a luminal cavity  
49 in the receptor triggers a conformational change in its cytoplasmic face that exposes  
50 a lysine motif recognised by the COP I coat complex (Bräuer et al., 2019). Release  
51 of the signal in the neutral pH environment of the ER results in a reversal of this  
52 conformational change, burying the lysine motif, and exposing a patch of aspartate  
53 and glutamate residues presumed to form a COPII-binding ER exit signal for the  
54 receptor (Bräuer et al., 2019; Newstead and Barr, 2020). Hence, the KDEL receptor  
55 cycles between the ER and Golgi capturing escaped ER proteins in a dynamic  
56 retrieval process (Dean and Pelham, 1990; Lewis and Pelham, 1992; Townsley et  
57 al., 1993; Zagouras and Rose, 1989). The rapid recycling of the receptor means it  
58 does not need to be stoichiometric with the ER concentration of retained proteins,  
59 only present at levels sufficient to capture escaped proteins that reach the Golgi  
60 (Newstead and Barr, 2020). However, ER resident proteins differ widely in  
61 abundance, yet, remarkably, this does not pose a problem for efficient retention of  
62 low abundance proteins. One possible explanation for this is the presence of HDEL  
63 and RDEL variants of the canonical KDEL signal with different binding affinities  
64 (Scheel and Pelham, 1998; Wilson et al., 1993). However, despite extensive  
65 mutation and structural analysis the molecular basis and functional significance of  
66 these affinity differences remains unclear (Bräuer et al., 2019; Townsley et al.,

67 1993). Complicating this picture, in some organisms including the yeasts  
68 *Kluyveromyces lactis* and *Schizosaccharomyces pombe*, DDEL and ADEL variants  
69 are used as ER retrieval signals (Pidoux and Armstrong, 1992; Semenza and  
70 Pelham, 1992). Comparative analysis of the budding yeast *Saccharomyces*  
71 *cerevisiae* HDEL- and *K. lactis* DDEL-receptors implicated a luminal region including  
72 a key variant residue, D50 in the human receptor, in selectivity for DDEL (Lewis et  
73 al., 1990; Semenza et al., 1990; Semenza and Pelham, 1992). Mutation of D50 to  
74 cysteine in the human receptor resulted in reduced binding affinity for KDEL, RDEL  
75 and HDEL (Scheel and Pelham, 1998). However, recent structure determination of  
76 the chicken receptor with a bound TAEKDEL peptide indicates this residue sits on  
77 the luminal surface of the receptor and does not make contact with any portion of the  
78 signal (Bräuer et al., 2019). Thus, although it is clear that the specificity of ER  
79 retrieval is encoded by the KDEL receptor, the molecular basis for the recognition of  
80 different signal variants remains unclear.

81 Our previous work has shown the KDEL receptor has a transporter-like  
82 architecture and undergoes pH-dependent closure around cognate retrieval signals  
83 (Bräuer et al., 2019; Newstead and Barr, 2020). However, the molecular basis for  
84 affinity differences for retrieval signal variants and any functional significance these  
85 differences may create, was not explained by that work or other previous studies.  
86 Furthermore, how signals are initially captured and selected from other sequences  
87 remains enigmatic. To answer these related questions, we solved structures of the  
88 human KDEL receptor in complex with both HDEL and RDEL retrieval signals, and  
89 performed a combination of computational and cell biological analysis. Based on this  
90 data, we can break down the retrieval signal recognition process into a series of  
91 steps for signal proofreading and initial capture of the free carboxyl terminus,

92 followed by full engagement with the binding cavity and finally pH-dependent closure  
93 and activation of the receptor.

94

## 95 **RESULTS**

### 96 **ER retrieval signals in mammalian cells**

97 To understand how the KDEL-receptor differentiates between cargo proteins, we first  
98 sought to define the major signal variants used in mammalian cells. For this purpose,  
99 we exploited luminal ER proteome datasets to investigate the relative abundance of  
100 retrieval signal variants (Itzhak et al., 2017; Itzhak et al., 2016). This confirmed that  
101 KDEL, HDEL and RDEL are the major variants in mammals, and the frequency of  
102 ER resident proteins with these variants of the retrieval signal at the -4 position is  
103 approximately equal (Figure 1a). However, this does not reflect the abundance of the  
104 proteins carrying the signal. Strikingly, the total concentration of KDEL bearing  
105 proteins is over five-fold higher than either HDEL or RDEL (Figure 1b). This largely  
106 reflects a small number of highly abundant ER-resident chaperones, BIP, PDI and  
107 calreticulin (Figure 1 – supplement 1a and b). Each of these proteins is present in  
108 the 5-10  $\mu\text{M}$  range, far more abundant than the dominant KDEL receptor 2  
109 (KDEL2) species which is estimated to be 0.2-0.3  $\mu\text{M}$  (Figure 1 – supplement 1c).  
110 In total, the concentration of retrieval signals thus exceeds that of the receptor by at  
111 least two orders of magnitude. In good agreement with previously reported studies  
112 on the mammalian KDEL receptor (Scheel and Pelham, 1998; Wilson et al., 1993),  
113 we found that HDEL has the highest affinity for the receptor  $K_D$  0.24  $\mu\text{M}$ , followed by  
114 KDEL  $K_D$  1.94  $\mu\text{M}$  and RDEL  $K_D$  2.71  $\mu\text{M}$  (Figure 1c). Previous work has suggested  
115 DDEL binds to semi-purified human KDEL receptors in membrane fractions and can  
116 function as a retrieval signal when the receptor is overexpressed at high level in

117 COS7 cells (Lewis and Pelham, 1992; Wilson et al., 1993). However, we find that  
118 DDEL binds with 60-fold lower affinity than HDEL ( $K_D$  14.9  $\mu$ M) (Figure 1c), in  
119 agreement with other data for purified KDEL receptors (Scheel and Pelham, 1998).  
120 Thus, the receptor binds to the HDEL sequence with one order of magnitude greater  
121 affinity than the canonical KDEL ligand present on the most abundant ER resident  
122 proteins. Despite this difference in affinities, mScarlet fusions with KDEL, RDEL or  
123 HDEL signals all triggered similar changes to the steady-state distribution of the  
124 KDEL receptor in cells, driving almost complete retrieval from the Golgi to the ER  
125 (Figure 1d and 1e). By contrast, expression of ADEL or DDEL had little effect on the  
126 Golgi-ER distribution of the receptor (Figure 1d and 1e). In line with these effects on  
127 the receptor, the mScarlet-KDEL, RDEL and HDEL ligands were retrieved to the ER,  
128 whereas ADEL and DDEL showed predominantly Golgi and punctate localisation  
129 consistent with secretion (Figure 1d). These latter observations explain why there  
130 are no verified examples of endogenous proteins using ADEL and DDEL retrieval  
131 signals in mammalian cells.

132         Given its higher affinity, why then is HDEL not the dominant ER retrieval  
133 signal, especially for crucial ER proteins such as BIP, PDI and calreticulin? We  
134 tested the idea that due to its higher binding affinity, increasing the concentration of  
135 HDEL bearing proteins would effectively compete for KDEL receptors in the Golgi,  
136 and prevent efficient ER retrieval of KDEL and RDEL containing proteins. To do this  
137 we used our series of variant xDEL signals, where x at the -4 position is either K, R,  
138 H, A or D. When expressed in cells, KDEL, RDEL and HDEL are retained in the cell,  
139 whereas ADEL and DDEL are mostly secreted (Figure 1 – supplement 1d and e).  
140 With the exception of HDEL this is broadly in line with their respective binding  
141 affinities. Despite binding to the receptor with a higher affinity (Figure 1c), HDEL was

142 less efficiently retained than either KDEL or RDEL (Figure 1 – supplement 1d and e).  
143 We then examined the effect of these ligands on the major ER proteins BIP and PDI  
144 as well as the less abundant chaperones ERP72 and ERP44 ((Figure 1 –  
145 supplement 1a). As predicted, ADEL and DDEL had little effect on ER retention,  
146 while HDEL caused secretion of all four proteins (Figure 1 – supplement 1f).

147         These results indicate that the retrieval system is selective yet not optimised  
148 for binding affinity, and instead has evolved to ensure optimal retrieval of a broad  
149 cohort of proteins of widely differing abundance. In human cells, ADEL and DDEL do  
150 not bind to the receptor with high affinity and do not function as retrieval signals,  
151 suggesting specific recognition of the -4 position is a key determinant for binding.  
152 Previously, it has been suggested that complementary charges at receptor position  
153 50 and the -4 position of the signal explain this specificity (Lewis and Pelham, 1992;  
154 Semenza and Pelham, 1992). However, this mechanism does not obviously explain  
155 how ADEL, with no charged residue at the -4 position, functions as a signal in some  
156 organisms. How signal selectivity is achieved is therefore a crucial question we need  
157 to answer.

158

### 159 **HDEL and RDEL signals bind similarly to the canonical KDEL variant**

160 To understand the molecular basis for the affinity differences between retrieval signal  
161 variants, we determined structures for the chicken KDELR2 bound to HDEL and  
162 RDEL signals. These structures with TAEHDEL and TAERDEL peptides have  
163 resolutions of 2.24 and 2.31 Å, respectively (Figure 2a-2c and Table S1). In both  
164 instances the overall structure of the receptor is similar to our previous complex with  
165 the TAEKDEL peptide (Figure 2d), with a root mean square deviation (R.M.S.D.) of  
166 0.223 and 0.153 Å over 200 C<sub>α</sub> atoms for the HDEL and RDEL structures,

167 respectively. Both HDEL and RDEL peptides are bound in a vertical orientation with  
168 respect to the membrane, with the side chains clearly resolved in the electron  
169 density map (Figure 2 – supplement 1a and b). Both the HDEL and RDEL peptides  
170 interact with the receptor through the same salt bridge interactions seen for the  
171 KDEL peptide (Figure 2b-2d). Superimposing the three peptides reveals little  
172 movement of the peptide at the -1 and -2 positions when bound to the receptor  
173 (Figure 2e). For RDEL, we observe slight movement of the backbone C<sub>α</sub> atom of the  
174 peptide to accommodate the larger arginine side chain, resulting in a minor  
175 repositioning of the glutamate at the -3 position in the receptor. Nonetheless, the  
176 position of the positive charge at the -4 position on all three peptides is identical  
177 relative to E117 and W120 within the receptor, supporting the view that a salt bridge  
178 is formed with E117 on TM5. D50 previously proposed to be important for  
179 recognition of the -4 position is at >5 Å distance, outside the region depicted in the  
180 figures, indicating it is unlikely to form a salt bridge and directly contribute to binding  
181 of the retrieval signal. Some studies have suggested the core tetrapeptide retrieval  
182 motif should be extended to include the -5 and -6 positions (Alanen et al., 2011).  
183 However, these positions are not conserved in retained ER luminal proteins (Figure  
184 1a). In our structures, the glutamate at the -5 position sits close to S54, but would not  
185 obviously increase the binding affinity, whereas no contacts are made to the -6  
186 position. In all cases, the -1 position leucine residue and free carboxy terminus form  
187 interactions to R47 and Y48 on TM2, as well as R159 and Y162 on TM6. The  
188 glutamate at position -2 forms a further salt bridge interaction to R5 on TM1 and a  
189 hydrogen bond to W166 on TM6, whereas the aspartate at -3 forms a salt bridge  
190 with R169, also on TM6. For the histidine side chain at the -4 position of HDEL, the  
191 imidazole group is predicted to form a  $\pi$ - $\pi$  stacking interaction with W120 (Figure



192 [2b](#)). In comparison, the RDEL arginine side chain sits in the same position as the  
193 amine group of the KDEL sequence and could thus interact with W120 via a cation- $\pi$   
194 interaction and E117 via a classical salt bridge interaction ([Figure 2c](#)). We therefore  
195 conclude that both E117 and W120 play a role in retrieval signal binding, and the  
196 only major difference between the HDEL, RDEL and KDEL signals is the precise  
197 nature of the interaction with W120 indicating that this may be a critical residue to  
198 explain the affinity of different signals.

199

### 200 **Probing the importance of E117 and W120 for signal binding**

201 To directly test the requirement for E117 and W120 in signal recognition, ligand  
202 binding assays using recombinant chicken wild type, E117 or W120 mutant KDELR2  
203 were performed (Bräuer et al., 2019). All proteins had similar thermal stability  
204 indicating they were correctly folded. For the wild type receptor at pH 5.4,  $K_D$  for  
205 KDEL and HDEL signals were  $1.9 \pm 0.46 \mu\text{M}$  and  $0.26 \pm 0.04 \mu\text{M}$ , respectively  
206 ([Figure 3a and 3b](#)). Conservative substitution of E117 with aspartate resulted in a  
207 slight reduction in binding for both KDEL and HDEL,  $K_D$  of  $2.1 \pm 0.33 \mu\text{M}$  and  $0.52 \pm$   
208  $0.02 \mu\text{M}$ , respectively ([Figure 3a and 3b](#)). Substitution of E117 with alanine had a  
209 greater effect on KDEL binding,  $K_D \sim 9.3 \pm 1.0 \mu\text{M}$ , compared to HDEL,  $K_D 0.52 \pm$   
210  $0.02 \mu\text{M}$  ([Figure 3a and 3b](#)). This suggested that any salt bridge to E117 plays a  
211 greater role for KDEL than HDEL signals.

212 We next examined the contribution of W120 to signal recognition. Tryptophan  
213 side chains have long been recognized as important contributors in protein ligand  
214 interactions, as they are capable of interacting with ligands via both aromatic and  
215 charged forces (Dougherty, 1996; Liao et al., 2013; Okada et al., 2001). Our  
216 structures show that the -4 position histidine, arginine or lysine side chain of the

217 human retrieval signal variants can in principle interact favourably with W120 via  
218 cation- $\pi$  interactions. We also reasoned that given the additional  $\pi$ - $\pi$  stacking  
219 observed with the imidazole group in the crystal structure, this interaction might  
220 explain the increased affinity observed for the HDEL signal variant. Mutation of  
221 W120 to alanine resulted in loss of binding to the KDEL peptide and it was not  
222 possible to calculate a  $K_D$  (Figure 3a). For the HDEL peptide, binding was reduced to  
223 20% confirming that W120 plays an important role in mediating receptor-peptide  
224 interactions (Figure 3b). Consistent with the hypothesis that the -4 histidine of HDEL  
225 undergoes  $\pi$ - $\pi$  stacking interactions with W120, conserved substitution to  
226 phenylalanine supported 50% HDEL binding with  $K_D$   $5.5 \pm 0.57 \mu\text{M}$ , whereas no  
227 interaction was observed with the KDEL peptide (Figure 3a and 3b). Thus, W120  
228 plays a crucial role in binding of both KDEL and HDEL signals and may explain the  
229 higher affinity of the receptor for HDEL. By contrast, E117 is less important and it is  
230 unclear why it is a conserved feature of the binding site.

231 To analyse whether the properties measured using purified components *in*  
232 *vitro* reflect the behaviour of the KDEL receptor and retrieval system *in vivo*, we  
233 analysed the ability of these same variants in the human KDEL receptor to  
234 differentiate between human retrieval signal sequences in a cellular ER retrieval  
235 assay. All the receptor mutants tested reached the Golgi apparatus supporting the  
236 view they are able to fold and exit the ER (Figure 3c, -Ligand, and Figure 3 –  
237 supplement 1a). The WT receptor showed robust retrieval to the ER in response to  
238 model cargo proteins bearing KDEL, RDEL or HDEL retrieval sequences (Figure 3c  
239 and Figure 3 – supplement 1a-d). Receptors with conservative (E117Q and E117D)  
240 or non-conservative (E117A) substitutions at E117 were efficiently retrieved to the  
241 ER with KDEL, RDEL or HDEL signal variants (Figure 3c and Figure 3 – supplement

242 [1b-d](#)). By contrast, receptors with mutations at W120A and W120F did not respond  
243 to KDEL and RDEL signals and showed greatly reduced response to HDEL ([Figure](#)  
244 [3c and Figure 3 – supplement 1b-d](#)). The residual response to HDEL was abrogated  
245 in a double E117A/W120A mutant receptor ([Figure 3c and Figure 3 – supplement](#)  
246 [1b-d](#)). This *in vivo* behaviour is in good agreement with the changes to affinity  
247 measured using *in vitro* binding assays ([Figure 3a and 3b](#)), and supports the view  
248 that W120 is of greater importance for ligand binding and ER retrieval.

249 To provide further support for this conclusion, we investigated the free energy  
250 of interaction between the histidine side chain of the retrieval signal and W120 of the  
251 receptor. Protonation of the HDEL histidine is a crucial consideration since retrieval  
252 signal binding to the receptor occurs at acidic pH in the Golgi. We therefore asked if  
253 the protonation state of the histidine is important for binding affinity. Molecular  
254 mechanics-based alchemical transformation was used to compute the free energy  
255 difference of changing the lysine in KDEL to different protonation states of the  
256 histidine in HDEL. The binding free energy of HDEL is  $-1.8 \pm 1.4$  kcal.mol<sup>-1</sup> stronger  
257 than the KDEL signal ([Table S2](#)), which is in good agreement with the expected -1.3  
258 kcal/mol free energy difference derived from measured  $K_D$  values for KDEL and  
259 HDEL. The preference for HDEL of  $-1.9 \pm 0.2$  kcal.mol<sup>-1</sup> is mainly attributed to the  
260 protonated histidine which makes favourable cation- $\pi$  interactions with W120 ([Table](#)  
261 [S2, HIP](#)). In agreement with the experimental data ([Figure 3b and 3c](#)), the W120F  
262 mutation, which is anticipated to preserve the cation- $\pi$  interactions, reduced but did  
263 not abolish the preference for HDEL to  $-0.7 \pm 1.6$  kcal.mol<sup>-1</sup>, notwithstanding the  
264 large error on this calculation. Furthermore, the W120A mutation which eliminates  
265 the cation- $\pi$  interactions, greatly reduced the preference for HDEL to  $-0.3 \pm 0.9$   
266 kcal.mol<sup>-1</sup>.

267 To quantify the strength of the  $\pi$ - $\pi$  and cation- $\pi$  interactions between W120  
268 variants and the histidine, we decomposed the interactions using symmetry-adapted  
269 perturbation theory from quantum mechanics. Although both W120 and W120F form  
270  $\pi$ - $\pi$  and cation- $\pi$  interactions with protonated histidine, W120F exhibits  $\sim 1.5$  kcal/mol  
271 weaker  $\pi$ - $\pi$  interactions and  $\sim 0.5$  kcal/mol weaker cation- $\pi$  interactions with the  
272 histidine (Figure 3d and Table S3). The consequence of these changes is that for  
273 W120F higher root mean squared fluctuations are seen (Figure 3e), indicative of less  
274 rigid binding. These fluctuations are further increased for W120A (Figure 3e),  
275 consistent with its greater effect on signal binding. These results support the  
276 hypothesis that the  $\pi$ - $\pi$  interactions between the protonated histidine sidechain and  
277 W120 explain the higher affinity observed for HDEL signals. Further support for this  
278 interpretation comes from *in vitro* analysis of the pH-dependence of HDEL binding.  
279 At pH6.4 HDEL shows  $\sim 60\%$  maximal binding to the receptor (Figure 3f), compared  
280 to  $<20\%$  seen at the same pH for KDEL (Bräuer et al., 2019). The level of HDEL  
281 binding seen at pH 7 would saturate the KDEL receptor in the ER if the most  
282 abundant luminal proteins such as BIP carried this signal variant. Our observation  
283 that W120 is also necessary for recognition of KDEL indicates that cation- $\pi$   
284 interactions to W120, rather than a salt bridge to E117, is the crucial determinant for  
285 recognition of the -4 position.

286

### 287 **E117 plays a role in KDEL receptor selectivity**

288 This mode of signal binding involving W120 is different than previously proposed,  
289 where charge complementarity between D50 in the receptor and the -4 position of  
290 the signal was thought to be a key determinant of specificity in ER retrieval (Lewis  
291 and Pelham, 1992; Scheel and Pelham, 1998; Semenza and Pelham, 1992).

292 However, as our crystal structures show, D50 is outside the immediate binding  
293 region for all retrieval signal variants and therefore unlikely to directly contribute to  
294 binding. Thus, the precise roles of D50 and E117 remain enigmatic. In this regard  
295 the behaviour of ADEL signals is noteworthy due to the simple methyl side chain.  
296 Comparison of different retrieval signals shows that ADEL does not activate the wild  
297 type human KDEL receptor ([Figure 1d and 1e](#)). The simplest explanation for this  
298 finding is that the -4 position is crucial for high affinity binding of retrieval signals to  
299 the human receptor. However, this view is unlikely to be correct. First, the KDEL,  
300 RDEL and HDEL bound receptor structures do not support the view that recognition  
301 of the -4 position requires D50, and instead provide an alternative possibility where  
302 E117 fulfils this role. However, our biochemical and functional data show that E117  
303 does not contribute greatly to signal binding affinity or retrieval in cells ([Figure 3a-](#)  
304 [3c](#)). Therefore, rather than selecting for the sequence, E117 may be more important  
305 to select against unwanted signal variants. To test this idea, we examined the  
306 response of E117A mutant receptors to variant ADEL and DDEL signals.  
307 Remarkably, the E117A mutant receptor relocated to the ER in response to both  
308 KDEL and ADEL, but not DDEL signals ([Figure 4a and 4b](#)). In *S. pombe* and *K.*  
309 *lactis*, organisms where ADEL and DDEL are used for ER retrieval, the E117  
310 position is either an asparagine or a glutamine residue, and we therefore tested  
311 E117N and E117Q mutants next. Similar to the results with E117A, E117Q and  
312 E117N receptors move to the ER in response to KDEL or ADEL signals, yet  
313 interestingly still failed to respond to DDEL ([Figure 4a and 4b](#)). Ligand expression  
314 was in a similar range in all instances ([Figure 4 – supplement 1](#)), and in the absence  
315 of ligand all three mutant receptors localised to the Golgi with a low ER background  
316 indicating normal folding and ER exit ([Figure 4a](#)).

317 Thus, E117 is important for determining which signals are rejected by the wild  
318 type human receptor based on the -4 position of the signal, but does not appear to  
319 play a major role in binding affinity. ADEL must bind to the E117A mutant receptors  
320 via the “DEL” tri-carboxylate portion of the retrieval signal, suggesting this region  
321 may be the major contributor to binding affinity for all signal variants. For HDEL, the  
322 protonated histidine side chain makes additional  $\pi$ - $\pi$  interactions with W120 to bind  
323 with higher affinity. Importantly, the lack of response to DDEL shows that signal  
324 selection and recognition must involve additional features in the *S. pombe* and *K.*  
325 *lactis* receptor, and we investigated this question further.

326

### 327 **A charge screening mechanism for signal differentiation by the KDEL receptor**

328 To identify additional features that might play a role in signal selection, we performed  
329 a comparison of the receptors and most abundant cognate ligands of the HSPA5/BIP  
330 family of ER resident proteins in different species. Although most regions of the  
331 receptor are highly conserved, as noted previously (Semenza and Pelham, 1992),  
332 sequence alignment reveals two regions where there is covariation that may be  
333 related to the cognate tetrapeptide retrieval signal (Figure 5a). In receptors  
334 recognising ADEL and DDEL, D50 is changed for asparagine, E117 for glutamine or  
335 asparagine, and position 54 is a positively charged arginine or lysine rather than a  
336 polar side chain (Figure 5a). To understand the consequences of these changes we  
337 examined their positions relative to the bound TAEHDEL signal (Figure 5b). This  
338 reveals that E117 and S54 sit close to the -4 histidine and -5 glutamate, respectively  
339 and D50 is over 5 Å away from any residue in the signal in the final bound state  
340 (Figure 5b). Analysis of the charge distribution across the surface of the receptor  
341 shows a negatively charged feature above the positively charged binding cavity

342 occupied by the DEL portion of the signal, with the -4 residue sited at the boundary  
343 to these two regions (Figure 5c). Strikingly, progressive introduction of changes in  
344 the human receptor to mimic the *K. lactis* receptor, D50N S/N54K E117Q erodes the  
345 negatively charged luminal feature (Figure 5d).

346 One simple explanation for this feature is that it extends the binding site to  
347 impart specificity for the region upstream of the core KDEL signal. However, analysis  
348 of different classes of ER luminal proteins from yeast and animal cells does not  
349 provide strong support for this possibility. The upstream sequences of many  
350 abundant ER proteins including human and yeast HSPA5/BIP homologues are acidic  
351 in nature, and not basic (Figure 5a and Figure 5 – supplement 1a), making any  
352 interaction unfavourable. For the human signal, the -4 position is crucial and  
353 mutation to A or D abolishes ER retrieval of the receptor (Figure S5b and Figure 5 –  
354 supplement 1d). Conversely, *S. pombe* and *K. lactis* BIP ADEL and DDEL signals  
355 become functional with the human receptor if the -4 position is changed to lysine  
356 confirming this is the critical residue, independent of upstream sequences (Figure 5  
357 – supplement 1c and d). In *K. lactis* BIP the -5 position is a bulky aromatic residue  
358 rather than a charged residue. Previous work has suggested that the budding yeast  
359 FEHDEL signal with a bulky aromatic residue at the -6 position does not function in  
360 mammalian cells (Wilson et al., 1993), however consistent with our other data we  
361 find this HDEL variant is also functional (Figure 5 – supplement 1c). Extending this  
362 analysis to human FKBP family proteins with even more diverse upstream  
363 sequences reveals no obvious pattern of conservation other than the canonical C-  
364 terminal HDEL or HEEL retrieval signal (Figure 5 – supplement 1e).

365 To directly test the role of the charged luminal surface in signal selection, we  
366 made a series of mutants introducing the changes seen in *K. lactis* and *S. pombe*

367 into the human receptor and tested these against KDEL, ADEL and DDEL signals. A  
368 single D50N mutation abolished the response to all signal variants and the receptor  
369 remained in the Golgi ([Figure 6a and 6b](#)). Thus, like E117, D50 is not the sole  
370 determinant of signal selectivity. Similarly, N54K reduced the response to KDEL but  
371 did not result in ADEL or DDEL recognition ([Figure 6a and 6b](#)). A D50N N54K double  
372 mutant showed a loss of specificity and gave an intermediate response to KDEL,  
373 ADEL and DDEL signals, showing that it is possible to uncouple binding from  
374 selectivity at the -4 position. We then combined D50N or N54K with E117Q  
375 mutations. These double mutant receptors showed switched specificity towards  
376 ADEL and DDEL with only a residual response to KDEL ([Figure 6a and 6b](#)).  
377 Combination of D50N N54K and E117Q improved the response to ADEL and DDEL  
378 and further reduced that towards KDEL ([Figure 6a and 6b](#)). Comparable results were  
379 obtained with a *S. pombe* like D50N N54R E117N triple mutant receptor ([Figure 6 –](#)  
380 [supplement 1a and b](#)). Both these altered specificity receptors responded to the  
381 cognate ADEL or DDEL variant of BIP for that organism, a response that was  
382 abolished solely by mutation of the -4 position of the signal ([Figure 6 – supplement](#)  
383 [1a and b](#)).

384         These results indicate that the -4 position of the signal is read out during initial  
385 signal binding and is important for exclusion of unwanted signals, but is less  
386 important for binding affinity. We therefore tested whether the mode of ADEL and  
387 DDEL binding to the switched specificity receptors still involves W120. A D50N N54K  
388 E117Q W120A mutant receptor does not relocate from the Golgi to the ER with  
389 KDEL and ADEL signals and shows only a small response to the DDEL signal  
390 ([Figure 6a and 6b](#)). Together, these findings suggest a common mode of binding for  
391 all retrieval signal variants through residues conserved in all species. Specificity for



392 the -4 position is largely achieved through a proofreading mechanism involving two  
393 gatekeeper residues, D50 and E117, as the signal enters the ligand binding cavity.  
394 An E117A substitution partially uncouples this mechanism and allows ADEL binding,  
395 whereas both D50 and E117 residues have to be changed to allow DDEL binding.  
396 Bringing together all our observations to this point, we conclude that the luminal  
397 surface of the receptor plays a crucial role in signal selectivity prior to adoption of the  
398 final activated state, perhaps by determining the rate of signal association from  
399 solution.

400

#### 401 **Initial retrieval signal capture by the free carboxyl terminus**

402 To explore the initial interaction of retrieval signals with the KDEL receptor we  
403 simulated an all-atom model of the KDEL signal with a free C-terminal carboxylate  
404 engaging with the receptor ([Supplemental movie 1](#)). This simulation shows that the  
405 signal initially encounters the receptor through a salt bridge interaction from its C-  
406 terminal carboxyl group with R169 on TM6 of the receptor ([Figure 7a, i.](#)). The C-  
407 terminal carboxyl group then moves to engage R5 ([Figure 7a, ii.](#)), shortly followed by  
408 interaction of the -2 glutamate with R169 ([Figure 7a, iii.](#)). Finally, the C-terminus  
409 engages with R47 on TM4 enabling the -3 aspartate to interact with R169 ([Figure 7a,](#)  
410 [iv.](#)). Thus, the carboxy-terminus of the retrieval signal sequentially engages R169,  
411 R5 and finally R47 ([Figure 7c](#)). Movement of the -4 position lysine towards E117 is  
412 concomitant with the final engagement of the carboxyl-terminus of the signal by R47,  
413 whereas D50 does not come in close proximity to the KDEL signal and there is only  
414 a transient interaction of S54 with the -5 position ([Figure 7d](#)).

415 We therefore propose a carboxyl-handover model for signal capture mediated  
416 by the ladder of arginine residues in the binding pocket ([Figure 7b](#)). As the carboxyl-

417 terminus progresses further into the receptor binding site, the carboxylate groups at  
418 positions -2 and -3 engage their respective positions in the D- and E-sites  
419 respectively. Only the final stage of the binding, where the receptor closes around  
420 the signal locking it in place is pH dependent, all other stages are predicted to be  
421 freely and rapidly reversible. Because many proteins have a free C-terminal  
422 carboxylate, this highlights the importance of an initial proofreading stage where non-  
423 cognate signals are rejected, as we have already argued, due to their net charge.

424 To test these ideas, we investigated the importance of the retrieval signal C-  
425 terminus and R169 in the receptor using *in vitro* binding assays and functional  
426 experiments in cells. First, we synthesised C-terminally amidated HDEL and KDEL  
427 peptides and assayed their ability to bind to wild-type receptors ([Figure 7e](#)). Blocking  
428 the C-terminal carboxylate in this way completely abolished binding to KDEL and  
429 reduced the affinity for the HDEL peptide by two orders of magnitude from  $19 \pm 1.3$   
430  $\mu\text{M}$  to  $1.7 \pm 0.1$  mM. For HDEL, this residual affinity suggests the peptide still enters  
431 and exits the binding pocket, but fails to trigger the final pH dependent capture. Next,  
432 we performed binding assays with R169 variant receptors. Comparable results to the  
433 C-amidated peptide binding assays were obtained with R169A, which showed no  
434 binding to KDEL and greatly reduced binding to HDEL ligands ([Figure 7f](#)).  
435 Conservative substitution to R169K greatly reduced binding of both HDEL and KDEL  
436 in line with predictions ([Figure 7f](#)). Finally, we tested the R169 variants in ER  
437 retrieval assays. R169A mutant receptors showed no response to KDEL and only  
438 ~10% response to HDEL signals ([Figure 7g](#), [Figure 7 – supplement 1a and b](#)). By  
439 contrast, the conservative substitution R169K showed an attenuated response to  
440 both signals, in agreement with the simulation and reduced binding affinity ([Figure](#)  
441 [7g](#), [Figure 7 – supplement 1a and b](#)). We therefore conclude that the interaction of

442 receptor R169 with the C-terminal carboxylate of the retrieval signal plays an  
443 important role in initial signal capture.

444  
445 **DISCUSSION**

446 **A baton-relay mechanism for initial signal capture by the KDEL receptor**

447 Canonical ER retrieval signals can be broken down into two components: the -4  
448 position, which enables the receptor to distinguish between different populations of  
449 ER proteins, and a tri-carboxylate moiety formed by the -3 aspartate, -2 glutamate  
450 and -1 C-terminal carboxylate. We propose a baton-relay handover mechanism for  
451 capture of this signal by the KDEL receptor wherein a ladder of three arginine  
452 residues in the receptor pairs with the three-carboxyl groups of the signal ([Figure 8](#)).  
453 During cargo capture, the receptor engages the retrieval signal in a stepwise  
454 process, with the C-terminal carboxyl group of the cargo protein moving between  
455 these three interaction sites. At neutral pH, C-terminal sequences will rapidly sample  
456 the binding site, a process that we imagine will occur in both the ER and Golgi  
457 apparatus. Only at acidic pH are cargo proteins captured once the C-terminus of the  
458 signal engages with R47 in the receptor, which then undergoes a conformational  
459 change to close around the signal, locking it in place, as we have explained  
460 previously (Bräuer et al., 2019). This mechanism explains why the retrieval signal  
461 must be located at the C-terminus of the cargo protein, and the defined requirement  
462 for either glutamate or aspartate residues at the -2 and -3 positions due to their  
463 carboxyl group containing side chains. Variation at the -4 position would not directly  
464 alter this initial capture mechanism, possibly explaining why it is the key determinant  
465 for signal selectivity.

466 The structures we have obtained for the KDEL receptor with bound HDEL,  
467 RDEL or KDEL signals reveal that the side chains at the -4 position form a salt

468 bridge interaction with E117 but, crucially, not D50 as previously proposed.  
469 Unexpectedly, the salt bridge interaction between E117 and the -4 position of the  
470 retrieval signal makes only a limited contribution to binding affinity and does not  
471 explain the higher affinity for HDEL. Our other data show that the higher affinity for  
472 HDEL is due to the stronger  $\pi$ - $\pi$  interaction between the histidine of the -4 position of  
473 the retrieval signal and W120 in the receptor. However, because E117A mutant  
474 receptors have expanded specificity and can recognise ADEL, we conclude that the  
475 side chain at the -4 position is unlikely to play a major role in binding affinity for  
476 signals other than HDEL. For these reasons, we refer to the -4 position as the  
477 passkey residue, important for the signal selection only. By determining net charge  
478 on the signal it may thus play a greater role in initial binding kinetics, rather than  
479 affinity per se.

480 Previous work has suggested that the -5 and -6 positions of the retrieval  
481 signal also play a key role in signal binding (Alanen et al., 2011), and that the  
482 individual human KDEL receptors have unique specificity (Raykhel et al., 2007).  
483 However, these properties are not completely consistent with the structures, pattern  
484 of sequence conservation, or wider analysis presented here. It is noteworthy that  
485 both those studies used a bimolecular fluorescence complementation approach  
486 where the signal and receptor are dimerised by a split YFP molecule that will likely  
487 contribute to the observed signal binding affinity. This will interfere with the initial  
488 proofreading mechanism described here, making comparison with our data difficult.  
489 Since the three human KDEL receptors share identical ligand binding residues and  
490 only differ in conservative substitutions at position 54, we believe they will have the  
491 same or closely-related ligand binding properties. Based on the structures it seems  
492 reasonable that the -5 position may contribute to signal proofreading in some cases.

493 However, as we show, a wide variety of signals that lack any obvious conserved  
494 features upstream of the canonical tetrapeptide function efficiently to trigger ER  
495 retrieval of the receptor ([Figure 1a and S5b-S5e](#)), suggesting the -5 position  
496 modulates but does not play an essential role in signal recognition. Taken together,  
497 these data support a model for retrieval sequence recognition that explains both the  
498 importance of the free C-terminal carboxyl group and how changes at the -4 position  
499 can modulate binding to the receptor.

500

### 501 **The important role of luminal pH in regulating HDEL-mediated ER retrieval.**

502 One important outcome from our work is the idea that KDEL receptors are not  
503 optimised for an individual signal and must retain the ability to differentiate variant  
504 high and low affinity ER retrieval signals. We propose that cells exploit these  
505 properties to maximise the retrieval efficiency of a broad range of ER resident  
506 proteins with widely different abundance, over 2 or 3 orders of magnitude. This idea  
507 explains an explanation for the functional significance of the affinity differences of  
508 retrieval signal variants in mammalian cells. The most abundant proteins use the  
509 KDEL retrieval signal, whereas lower abundance proteins tend to carry the HDEL  
510 signal. By artificially increasing the concentration of HDEL proteins we can show that  
511 this effectively poisons the ER retrieval system, leading to the secretion of normally  
512 retained ER chaperones. This behaviour is reminiscent of other cellular regulatory  
513 systems, where substrate or signal binding properties are optimised for rate and  
514 turnover, rather than for the highest affinity which can reduce throughput of the  
515 pathway. Indeed, in some cases electrostatic properties are exploited to create  
516 rapid-binding high-affinity inhibitors that outcompete substrates (Cundell et al., 2016;  
517 Schreiber and Fersht, 1996). This may explain why histidine has been selected for

518 the highest affinity variant of the signal to counteract this effect. For the HDEL variant  
519 of the retrieval signal, protonation of both the receptor histidine 12 and signal peptide  
520 histidine -4 favour binding to the receptor in the Golgi. However, deprotonation of  
521 both the retrieval signal and receptor at pH 7.0 enable rapid release in the ER, and  
522 hence receptor recycling to the Golgi. Thus, HDEL binds more tightly than KDEL in  
523 the Golgi, but still releases rapidly in the ER. A signal with the same affinity as HDEL  
524 that was not proton dependent would strongly inhibit retrieval even at low  
525 concentration due to slow release at neutral pH. An alternative mechanism to  
526 capture low abundance ER proteins would have been to increase the cellular  
527 concentration of the KDEL receptor from the observed low levels. That would require  
528 receptors to be nearly stoichiometric with cargo, a problematic proposition  
529 considering the millimolar concentration of ER chaperones. These potential traps are  
530 avoided by the combination of pH-regulation of both the receptor and the high affinity  
531 HDEL signal. Thus, the versatile binding site architecture of a single KDEL receptor  
532 enables differentiation of both high and low affinity signals, thereby enabling efficient  
533 ER retrieval of both low and high abundance proteins in eukaryotic cells.

534

## 535 **ACKNOWLEDGEMENTS**

536 We thank the staff at I24 Diamond Light Source, UK for access to the beamline. This  
537 work was supported by Wellcome awards (219531/Z/19/Z, 203741/Z/16/A and  
538 109133/Z/15/A) to SN, FAB and PCB. Computation time was provided by JADE  
539 (EP/P020275/1) and ARCHER via HECBioSim (<http://www.hecbiosim.ac.uk>),  
540 supported by an EPSRC grant (EP/R029407/1) to PCB. ZW is a Wellcome Trust  
541 PhD student (203741/Z/16/A)

542

543 The authors declare no competing financial interests.

544

545 **AUTHOR CONTRIBUTIONS**

546 FAB, SN, PB, AG and JLP designed the experiments. PB, AG, TS, JLP, FAB and SN

547 carried out experiments and interpreted the data. ZW and PCB designed and

548 performed the computational analysis. FAB and SN wrote the paper with input from

549 all authors.

550

551 **MAIN FIGURES**

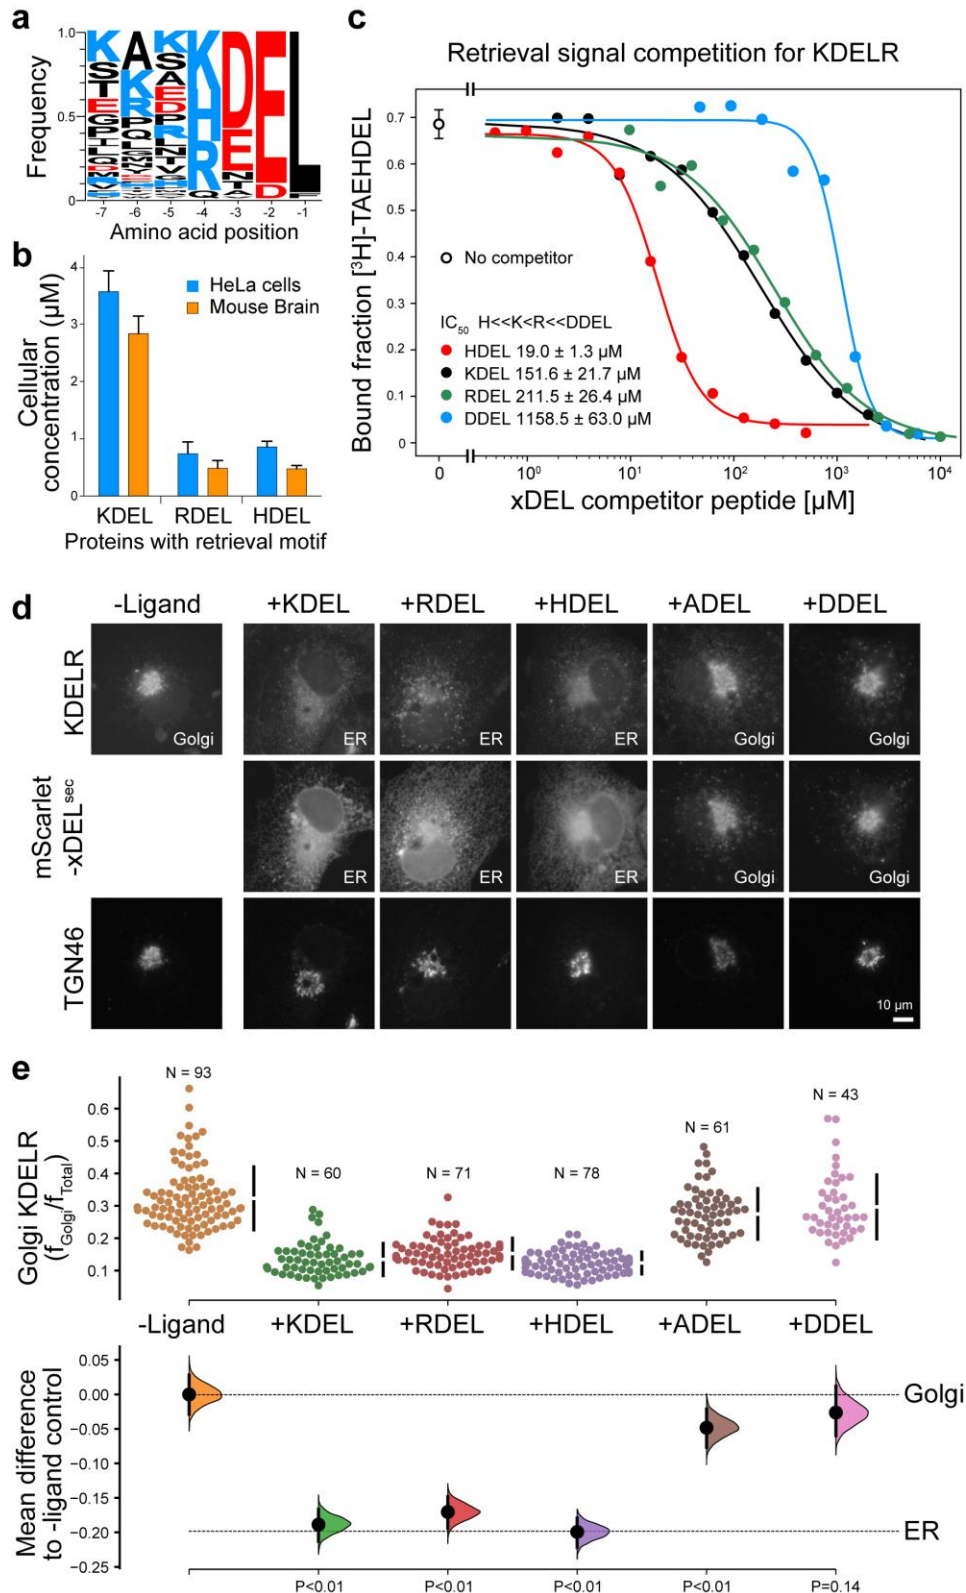

552

553 **Figure 1. ER retrieval signal abundance and affinity are not correlated. a.**

554 Sequence logos for ER resident proteins with C-terminal KDEL retrieval signals and

555 variants thereof calculated using frequency or protein abundance (Itzhak et al., 2017;



566 Itzhak et al., 2016). **b.** Combined cellular concentrations of ER resident proteins with  
567 canonical KDEL, RDEL and HDEL retrieval sequences in HeLa cells and mouse  
568 brain. **c.** Competition binding assays for [<sup>3</sup>H]-TAEHDEL and unlabelled TAEKDEL,  
569 TAERDEL and TAEHDEL to the KDEL receptor showing IC<sub>50</sub> values for the  
560 competing peptides. These were used to calculate apparent K<sub>D</sub> using the Cheng-  
561 Prusoff equation (Cheng and Prusoff, 1973). **d.** Endogenous KDEL receptor  
562 redistribution was measured in the absence (-ligand) or presence of K/R/H/A/DDEL  
563 (mScarlet-xDEL<sup>sec</sup>). TGN46 was used as a Golgi marker. Scale bar is 10µm. **e.** The  
564 mean difference for K/R/H/A/DDEL comparisons against the shared no ligand control  
565 are shown as Cummings estimation plots. The raw data for the fraction of KDEL  
566 receptor fluorescence in the Golgi is plotted on the upper axes with sample sizes and  
567 p values.  
568

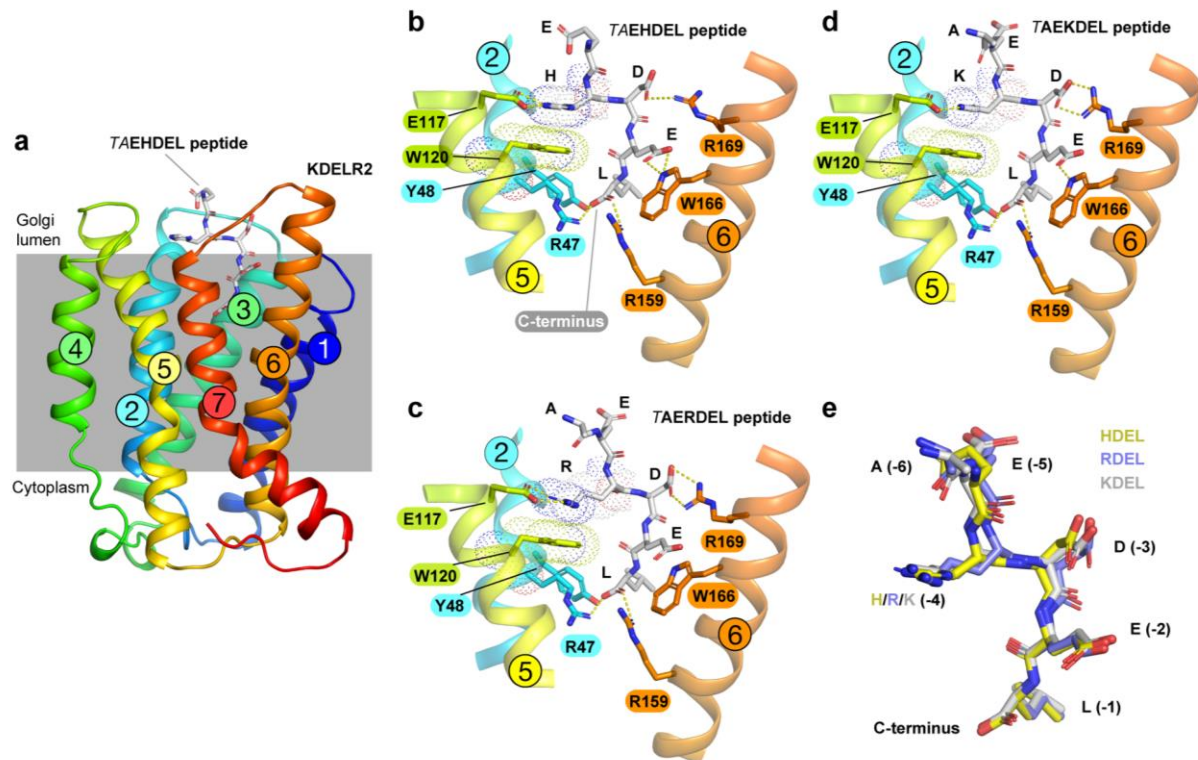

569

570 **Figure 2. Structures of the KDEL receptor bound to HDEL and RDEL retrieval**

571 **signals. a.** Crystal structure of chicken KDELR2 viewed from the side with the

572 transmembrane helices numbered and coloured from N-terminus (blue) to C-

573 terminus (red). The predicted membrane-embedded region of the receptor is

574 indicated by a grey shaded box, with labels at the luminal and cytoplasmic faces.

575 The TAEHDEL peptide is shown in stick format, coloured grey. **b.** Close up views of

576 bound TAEHDEL (this study), **c.** TAERDEL (this study) and **d.** TAEKDEL

577 (PDB:6I6H) peptides bound to the receptor are shown with contributing side chains

578 labelled. Hydrogen bonds are indicated as dashed lines. The molecular orbitals of

579 W120 and the -4 histidine on the peptide are shown as a dotted surface. **e.**

580 Superposition of the HDEL, RDEL and KDEL peptides reveals near identical binding

581 position within the receptor. Retrieval signal side chains are numbered counting

582 down from the C-terminus.

583

584

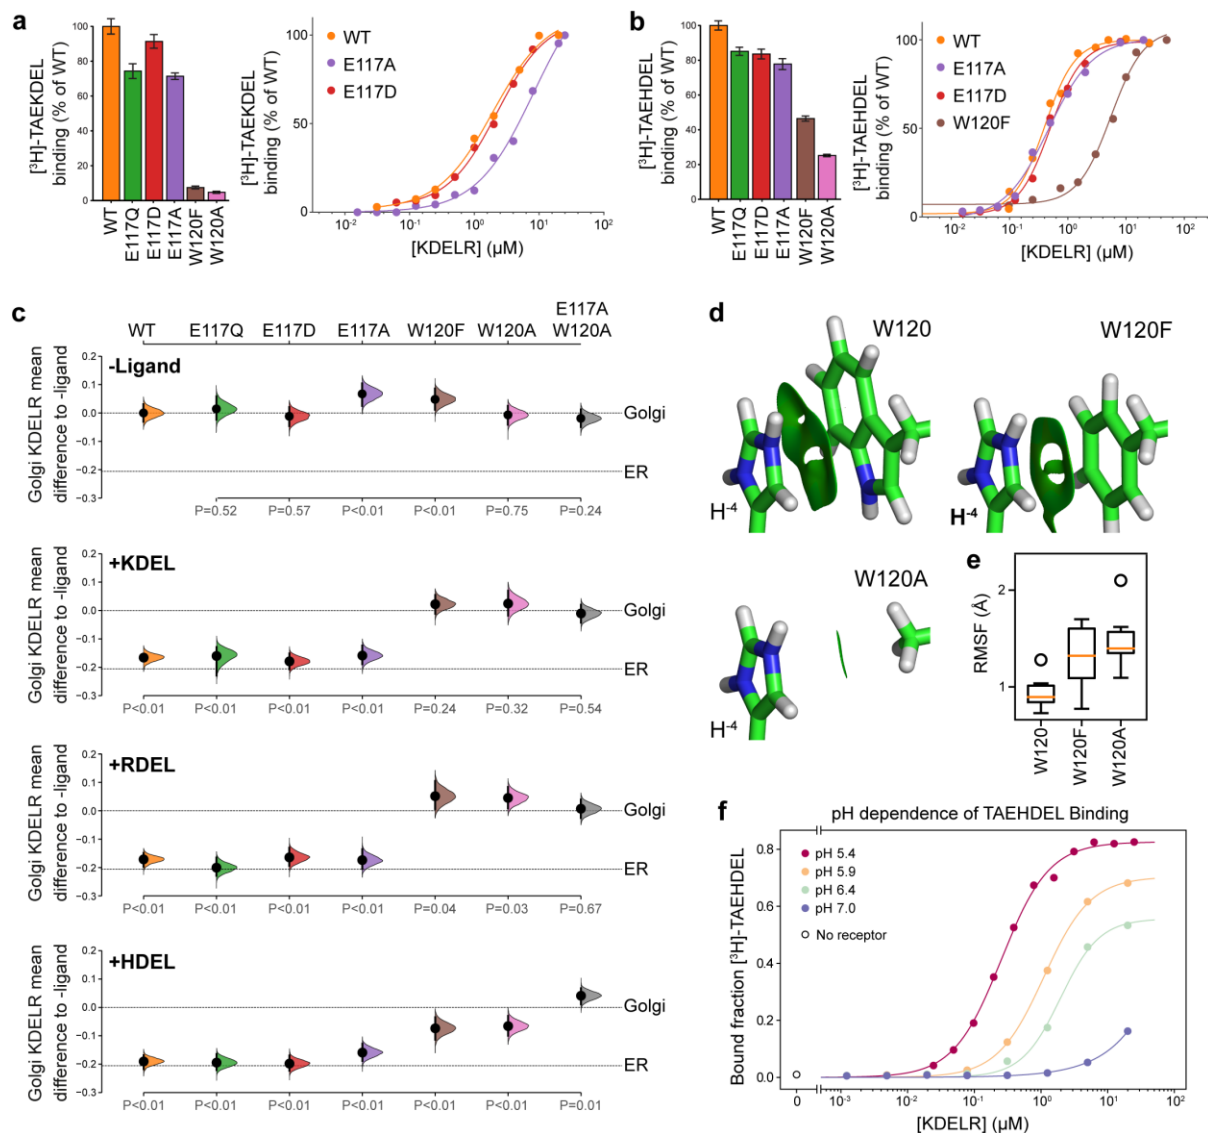

585

586 **Figure 3. Roles of KDEL receptor E117 and W120 in retrieval signal binding**

587 **and function in cells. a.** Normalised binding of [<sup>3</sup>H]-TAEKDEL and **b.** [<sup>3</sup>H]-

588 TAEHDEL signals to purified WT and the indicated E117 and W120 mutant variants

589 of chicken KDELRL2. Bar graphs show mean binding ± SEM (n=3). Line graphs show

590 titration binding assays. **c.** The fraction of WT, E117 and W120 mutant KDEL

591 receptor localised to the Golgi was measured before (no ligand) and after challenge

592 with different retrieval signals (K/R/HDEL) as indicated. Effect sizes are shown as

593 the mean difference for K/R/HDEL comparisons against the shared -ligand control

594 with sample sizes and p-values. **d.** The  $\pi$ - $\pi$  interactions between W120 and the  
595 histidine were visualised using reduced density gradient analysis. The wild-type  
596 W120 exhibit stronger  $\pi$ - $\pi$  interactions compared with W120F, while W120A shows  
597 no  $\pi$ - $\pi$  interactions. **e.** When W120 is changed to phenylalanine, the protonated  
598 histidine has a higher root mean squared fluctuation (RMSF) in the binding pocket,  
599 which is further increased for the W120A substitution. **f.** Binding of [<sup>3</sup>H]-TAEHDEL to  
600 the KDEL receptor was measured at pH5.4-7.0 and is plotted as a function of  
601 receptor concentration.

602

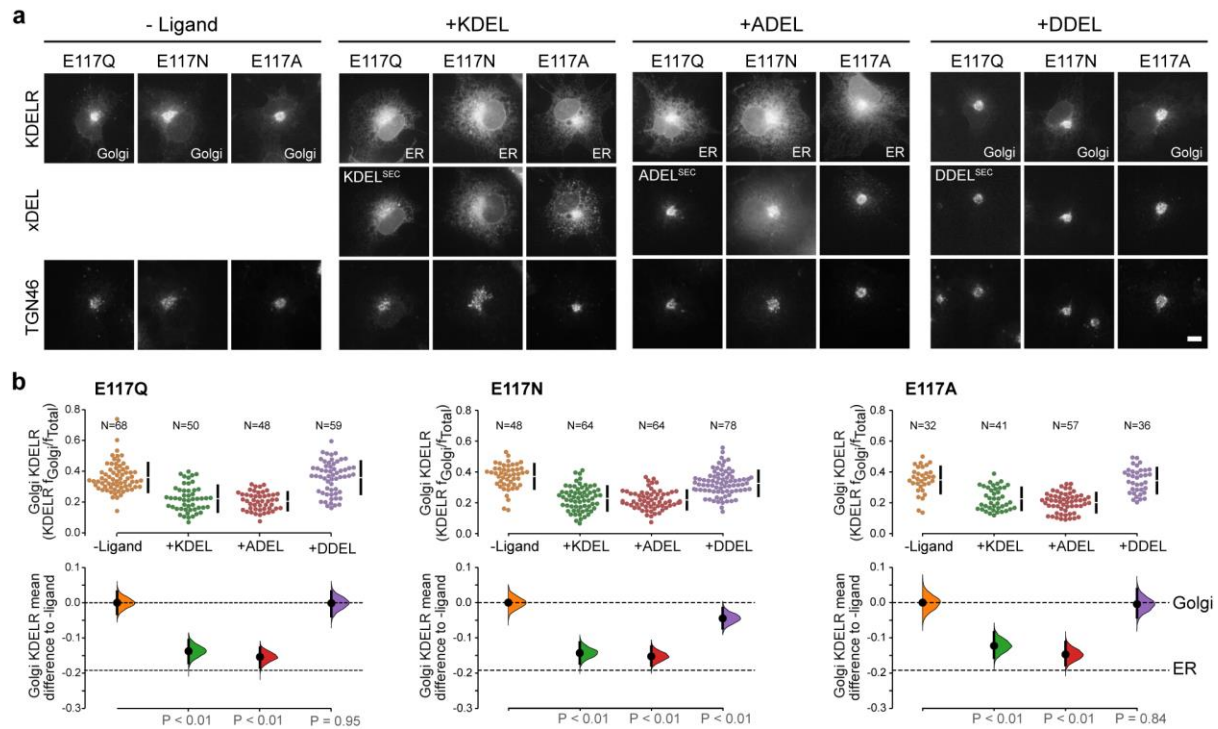

603

604 **Figure 4. KDEL receptor E117 mutants show reduced selectivity for retrieval**

605 **signals. a.** E117Q, E117N or E117A mutant KDEL receptors were tested for

606 K/A/DDEL-induced redistribution from Golgi to ER. KDEL receptor distribution was

607 followed in the absence (-ligand) or presence of K/A/DDEL<sup>SEC</sup>. TGN46 was used as a

608 Golgi marker. Scale bar is 10 $\mu$ m. **b.** The fraction of E117Q, E117N or E117A mutant

609 KDEL receptor localised to the Golgi was measured before (no ligand) and after

610 challenge with different retrieval signals (K/A/DDEL). Effect sizes are shown as the

611 mean difference for K/A/DDEL comparisons against the shared -ligand control with

612 sample sizes and p values.

613

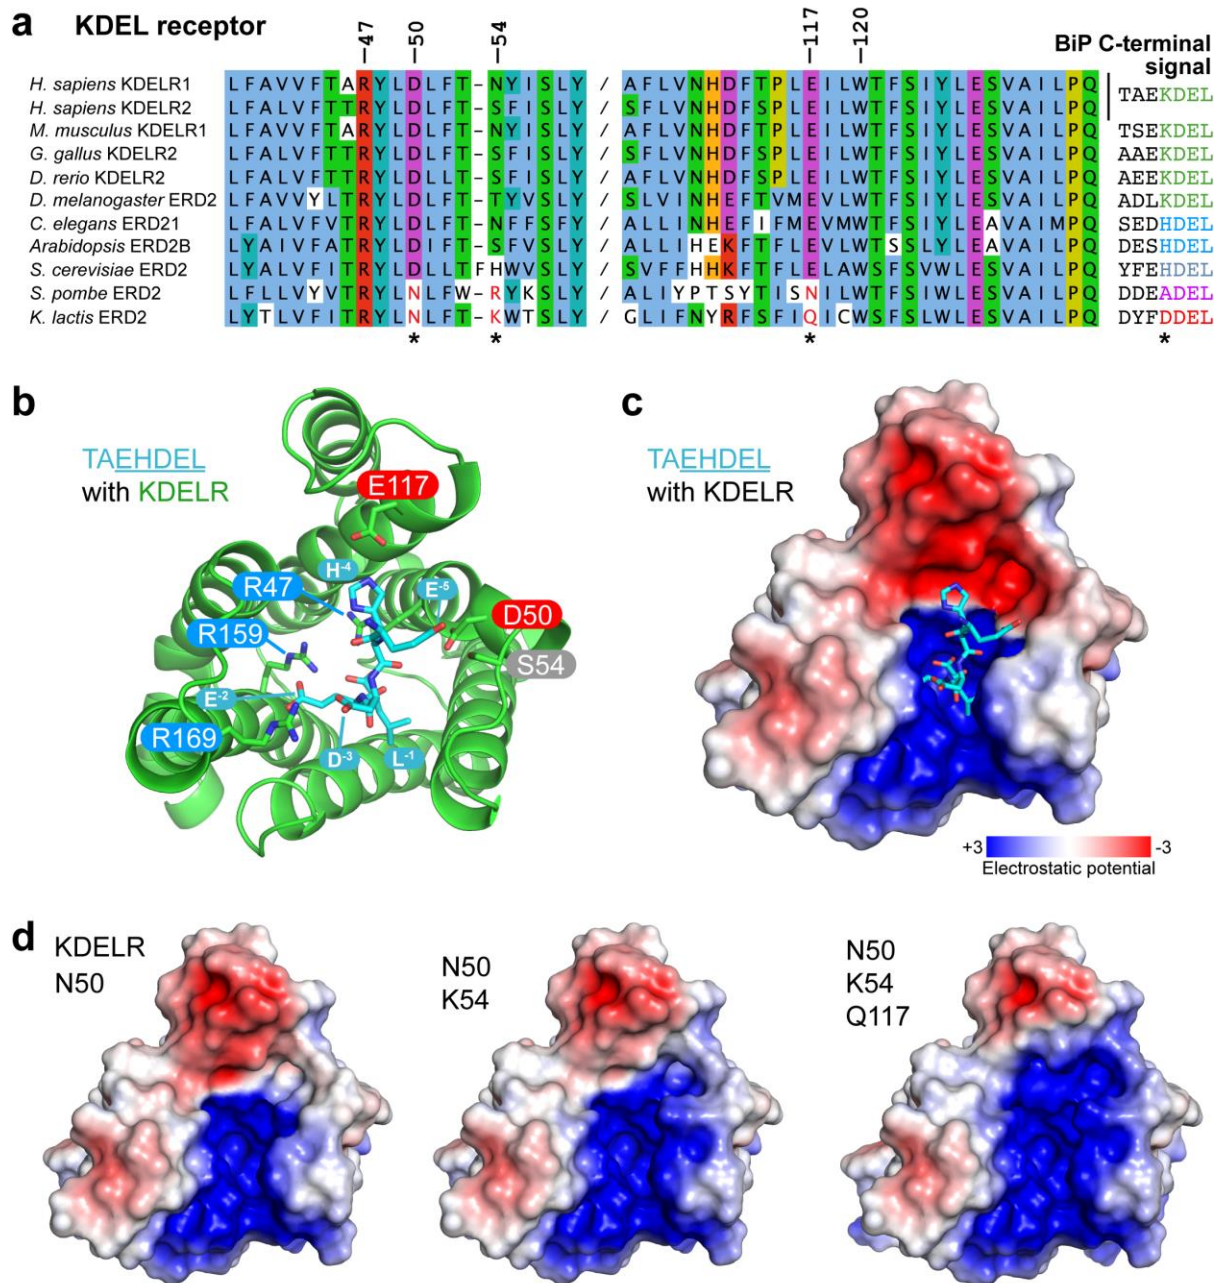

614

615

**Figure 5. Charge distribution across the luminal opening of the KDEL receptor**

616

**binding pocket. a.** KDEL receptor sequence alignment showing two regions centred

617

around amino acid D50 and W120 of the human proteins. Cognate retrieval signal

618

variants are shown to the right of the alignment. **b.** The structure of the KDEL

619

receptor with bound TAEHDEL highlighting key residues involved in ligand binding

620

and variant residues D50, N54 and E117. **c.** The charged surface for the WT KDEL

621

receptor and **d.** N50, N50/K54 and N50/K54/Q117 mutants is shown.

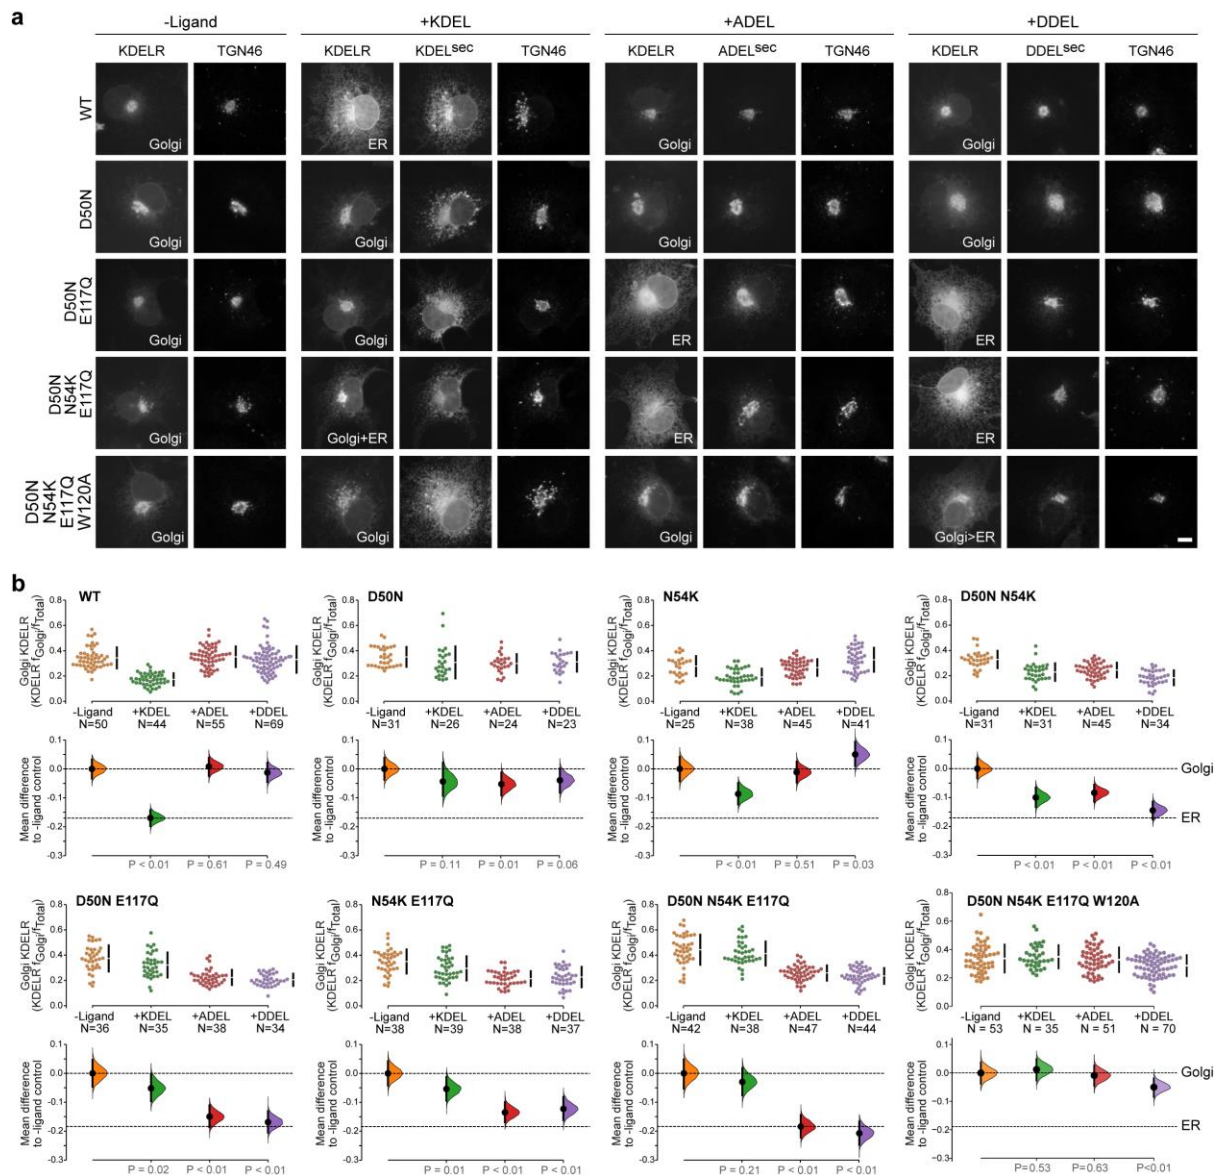

622

623 **Figure 6. Re-engineering the selectivity of the human KDEL receptor for ADEL**

624 **and DDEL signals. a.** WT and a series of “*K. lactis*”-like mutant KDEL receptors

625 were tested for K/A/DDEL-induced redistribution from Golgi to ER. KDEL receptor

626 distribution was followed in the absence (-ligand) or presence of K/A/DDEL<sup>sec</sup>.

627 TGN46 was used as a Golgi marker. Scale bar is 10 $\mu$ m. **b.** The fraction of WT and

628 mutant KDEL receptor localised to the Golgi was measured before (no ligand) after

629 challenge with different retrieval signals (K/A/DDEL). Effect sizes are shown as the

630 mean difference for K/A/DDEL comparisons against the shared -ligand control with

631 sample sizes and p values.

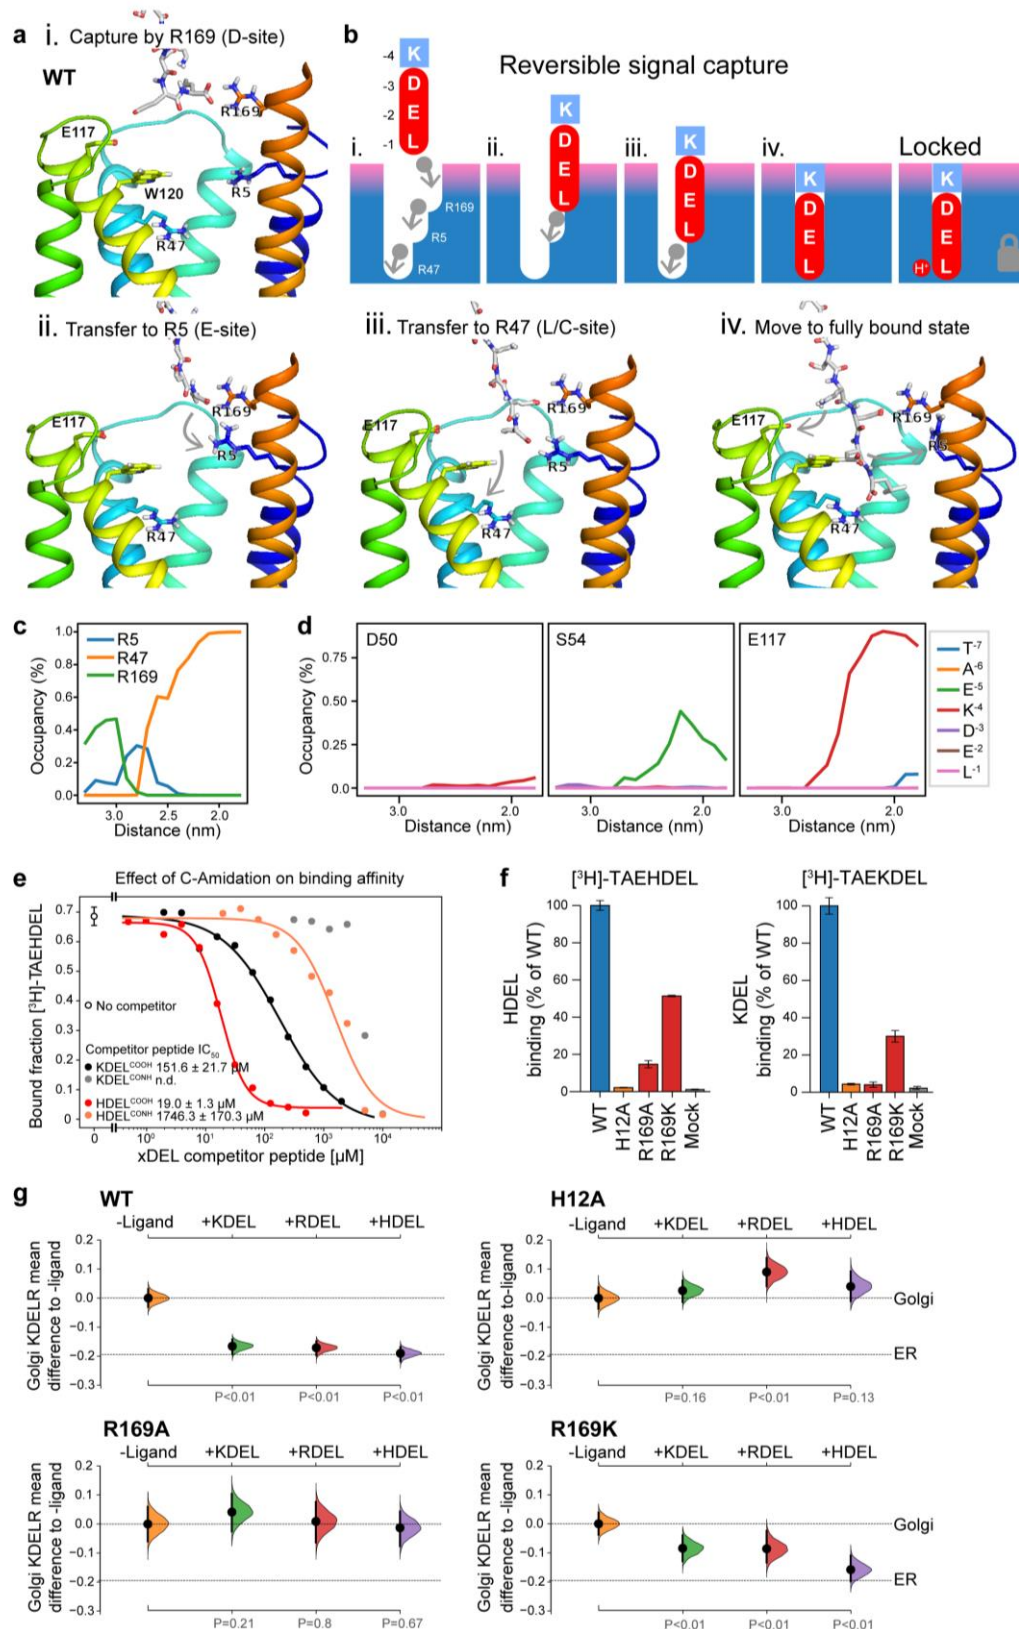

632

633 **Figure 7. A baton-relay mechanism for initial retrieval signal capture by the**

634 **KDEL receptor. a.** Images depicting the key stages (i.-iv.) of KDEL binding to the



635 wild-type (WT) human receptor simulated using molecular dynamics. Initial  
636 engagement of the C-terminus to R169 (i) is followed by transfer to R5 (ii), shortly  
637 followed by interaction of E -2 with R169 (iii). Finally, R47 engages the C-terminus  
638 allowing D -3 to interact with R169 (iv). **b.** A cartoon model depicting the key stages  
639 of retrieval signal binding and final pH-dependent locked state. **c.** Occupancy of the  
640 hydrogen bonds between the C-terminus of the KDEL retrieval signal and R5, R47  
641 and R169 is plotted as a function of signal position within the binding pocket. **d.** The  
642 occupancy of potential hydrogen bonds between the different positions of the KDEL  
643 retrieval signal and D50, S54 and E117 is plotted as a function of signal position  
644 within the binding pocket. **e.** Competition binding assays for [<sup>3</sup>H]-TAEHDEL and  
645 unlabelled TAEKDEL and TAEHDEL with a free (COOH) or amidated (CONH) C-  
646 terminus to chicken KDEL R2 showing IC<sub>50</sub> values for the competing peptides. **f.**  
647 Normalised binding of [<sup>3</sup>H]-TAEHDEL and [<sup>3</sup>H]-TAEKDEL signals to the purified WT  
648 H12A, R169A or R169K mutant chicken KDEL R2. A mock binding control with no  
649 receptor indicates the background signal. **g.** Distribution of WT, H12A, R169A and  
650 R169K KDEL receptors was measured in the absence (-ligand) or presence of  
651 K/R/HDEL<sup>sec</sup>. The mean differences for K/R/HDEL comparisons against the shared  
652 no ligand control are shown with sample sizes and p values.

653

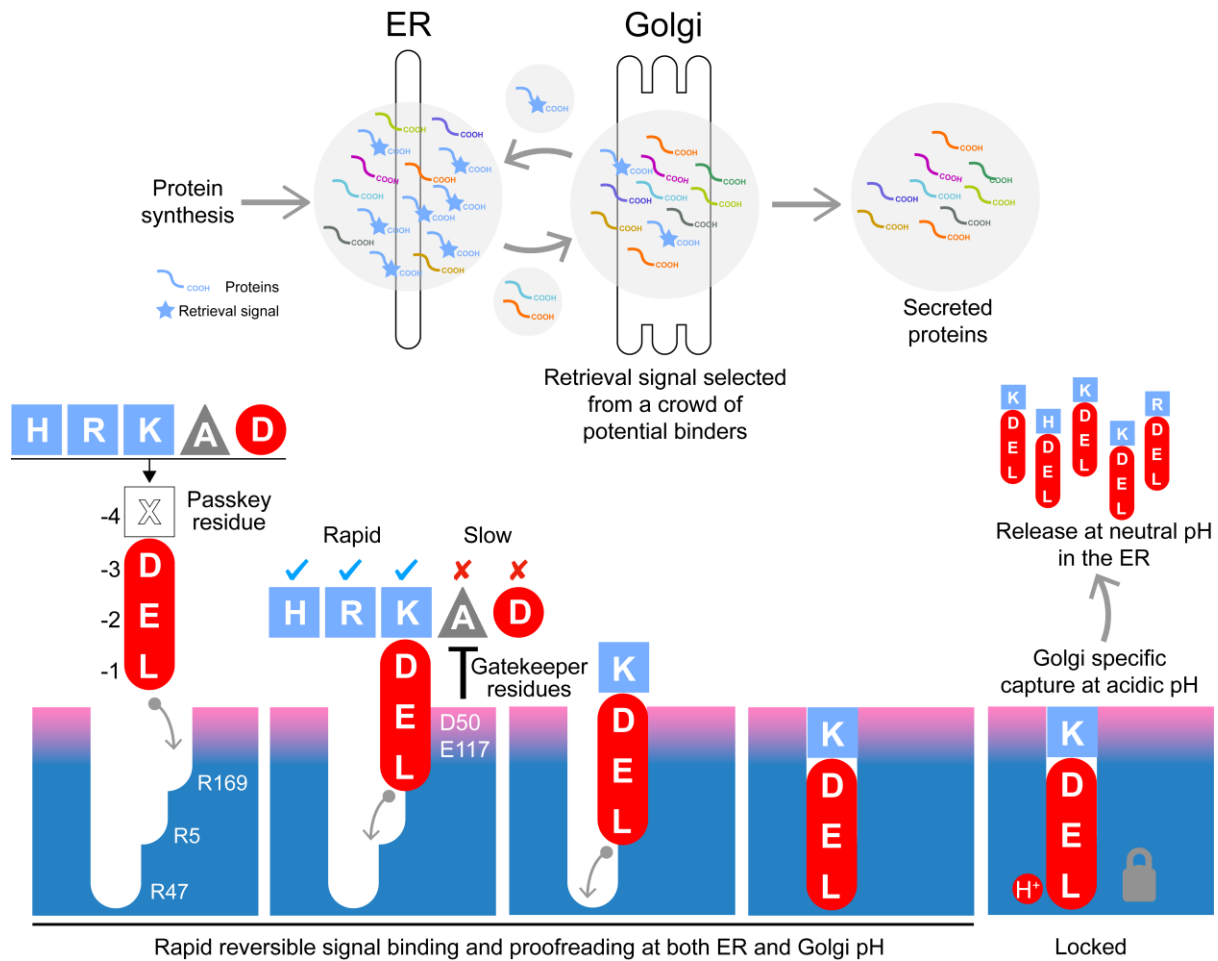

654

Rapid reversible signal binding and proofreading at both ER and Golgi pH

Locked

655 **Figure 8. A combined proofreading and baton-relay handover model for initial**  
 656 **signal capture by the KDEL receptor.** Newly synthesized secretory and ER luminal  
 657 proteins are translocated into the ER and on to the Golgi. Those proteins with C-  
 658 terminal retrieval signals are captured by the KDELR receptor and returned to the  
 659 ER. Other proteins with different C-terminal sequences move on to be secreted. The  
 660 retrieval signal can be broken down into two sections: the variable -4 passkey  
 661 position and the -1 to -3 positions with free carboxyl-terminus. Signals are initially  
 662 captured through their free carboxyl-terminus by the receptor R169. This is then  
 663 handed over to R5 and finally R47 in a baton-relay mechanism. Sequences are  
 664 proofread for the residue at the -4 position by gatekeeper residues D50 and E117.  
 665 Unwanted signal variants are rejected. Only signals that completely enter the binding  
 666 pocket and engage R47 can undergo pH dependent capture and return to the ER.

667 **FIGURE SUPPLEMENTS**

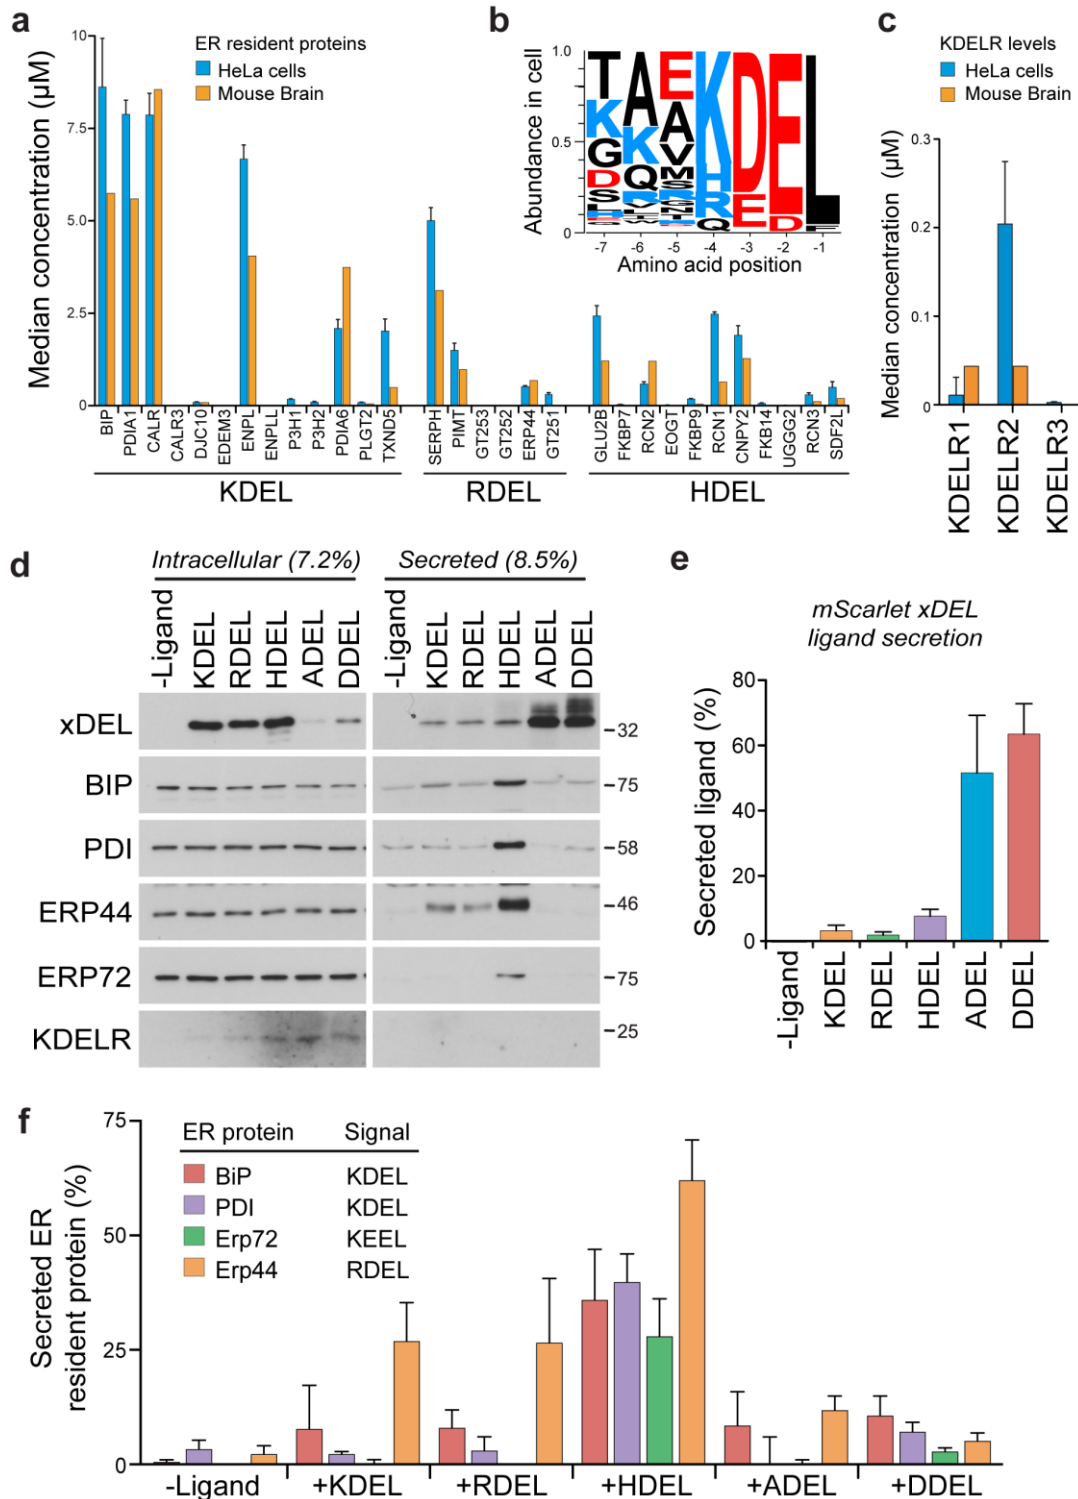

668

669 **Figure 1 – supplement 1. Abundance of ER resident proteins and chaperones**

670 **in human cells and mouse brain. a.** The mean concentration of ER resident

671 **chaperones with the indicated ER retrieval sequence variant is plotted in the bar**

672 graph (Itzhak et al., 2017; Itzhak et al., 2016). **b.** Combined cellular concentrations of  
673 ER resident proteins with canonical KDEL, RDEL and HDEL retrieval sequences in  
674 HeLa cells and mouse brain. **c.** The mean concentration of KDELR1, KDELR2 and  
675 KDELR3 in HeLa cells and mouse brain is plotted in the bar graph (Itzhak et al.,  
676 2017; Itzhak et al., 2016). **d.** Cells and media collected from cultures expressing the  
677 xDEL variants (mScarlet-xDEL<sup>sec</sup>) indicated in the figure were Western blotted for  
678 resident ER chaperones and KDELR. **e.** A bar graph of xDEL secretion showing  
679 mean  $\pm$  SEM (n=3). **f.** Endogenous ER chaperone secretion was measured by  
680 western blotting after challenge with different retrieval signals, and plotted as a bar  
681 graph showing mean  $\pm$  SEM (n=3).

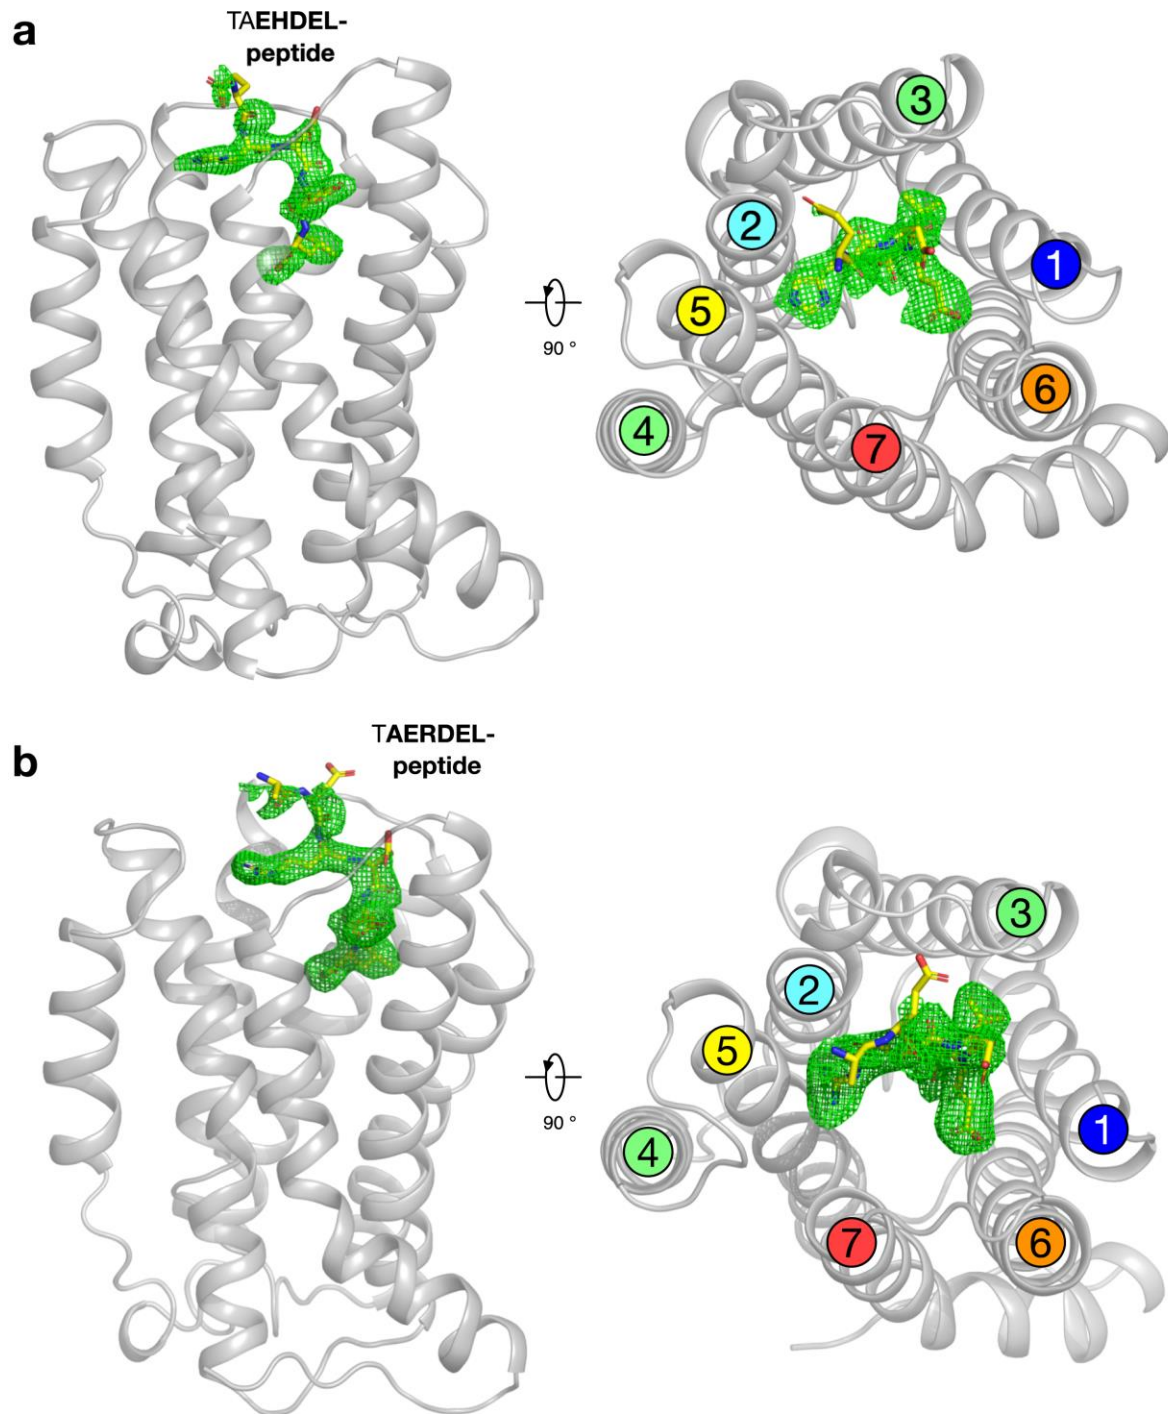

682

683

684

685

686

687

**Figure 2 – supplement 1. Polder difference density electron density maps for HDEL and RDEL peptides. a.** The structure of the KDELR bound to the TAEHDEL peptide is shown as in Figure 2a. The *mFo-DFc* difference electron density used for model building is displayed (green mesh), contoured at  $3\sigma$ . **b.** Equivalent maps calculated for the RDEL peptide.

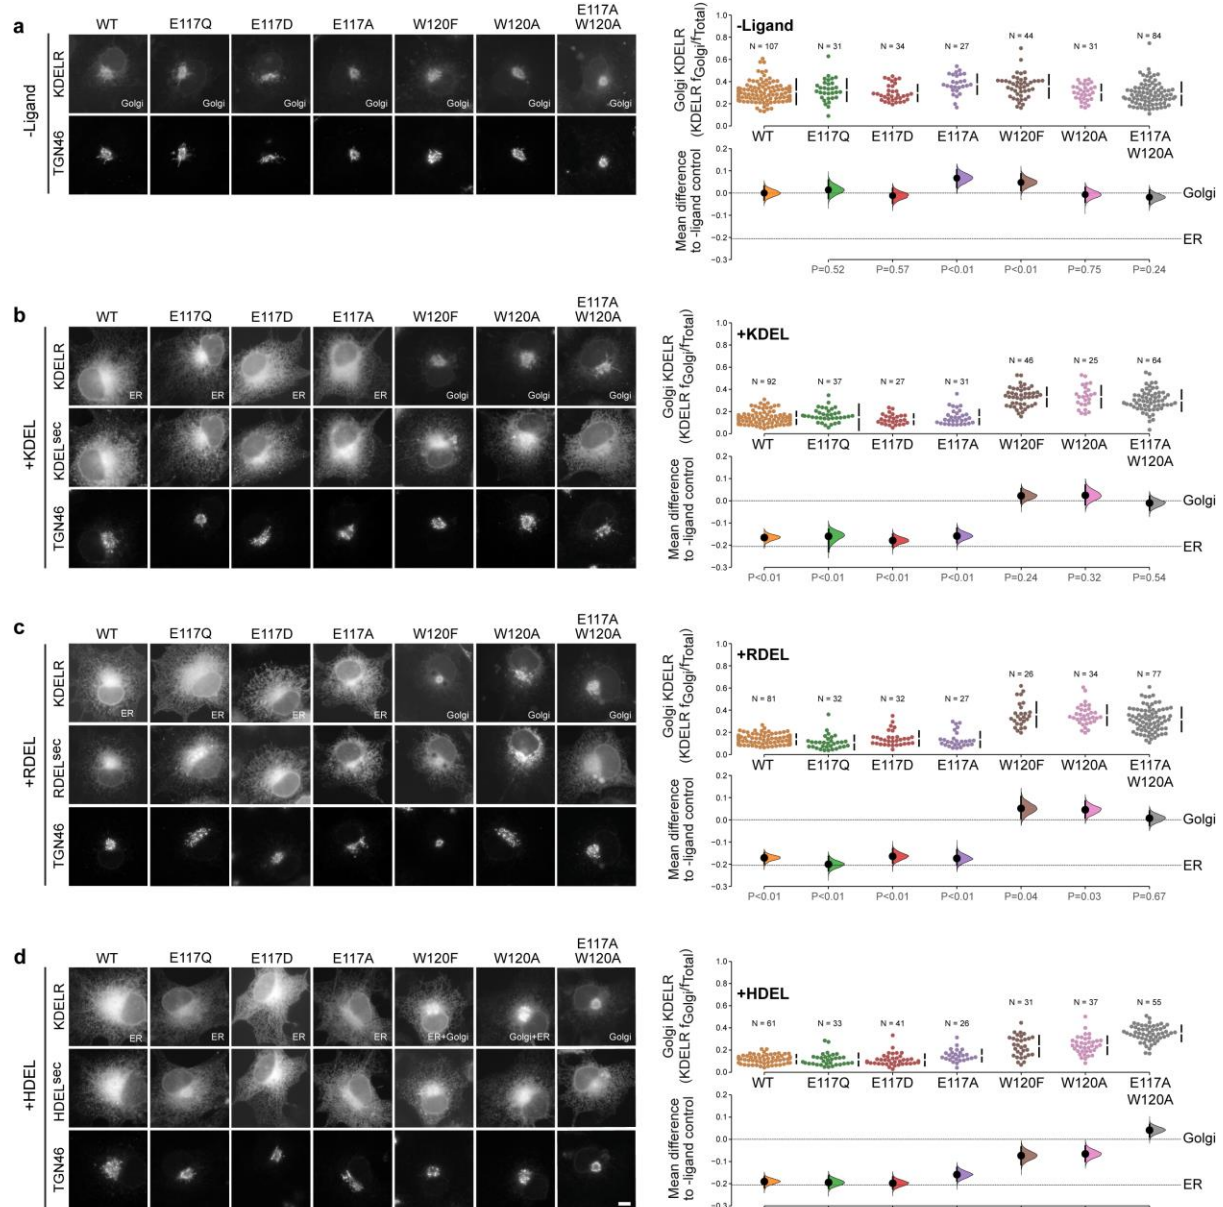

688

689 **Figure 3 – supplement 1. Effect of KDEL receptor E117 and W120 mutants on**  
 690 **retrieval signal function in cells. a.** Distribution of WT, E117 and W120 mutant  
 691 KDEL receptors was measured in the absence (-ligand) or presence of **b. KDEL, c.**  
 692 RDEL or **d. HDEL** retrieval signals (K/R/HDEL<sup>sec</sup>). TGN46 was used as a Golgi  
 693 marker. Scale bar is 10µm. The fraction of WT, E117 and W120 mutant KDEL  
 694 receptor localised to the Golgi was measured before (no ligand) and after challenge  
 695 with different retrieval signals (K/R/HDEL) as indicated. Golgi signal for KDEL  
 696 receptor and ligand intensity are shown on the scatter plots with sample sizes. Effect

697 sizes are shown as the mean difference for K/R/HDEL comparisons against the  
698 shared -ligand control with sample sizes and p-values. The Cumming estimation  
699 plots for this data are used in main Figure 3c.

700

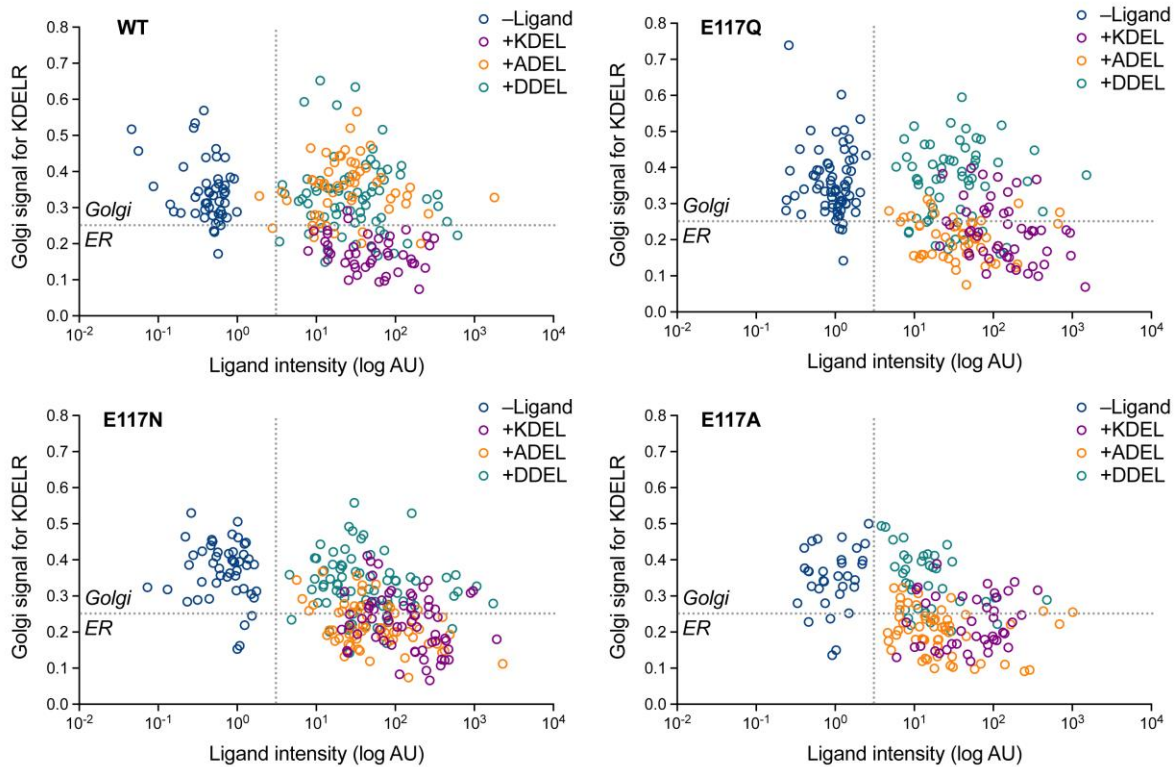

701

702 **Figure 4 – supplement 1. Effect of ligand levels on the response of KDEL**

703 **receptor E117 mutants to KDEL, ADEL and DDEL signals.** Distribution of WT,  
704 E117A, E117Q and E117N mutant KDEL receptors was measured in the absence (-  
705 ligand) or presence of KDEL, ADEL and DDEL retrieval signals. The fraction of WT,  
706 E117 mutant KDEL receptor localised to the Golgi was measured before (no ligand)  
707 and after challenge with different retrieval signals. Ligand intensity was also  
708 measured and plotted against the Golgi fraction of KDEL receptor.



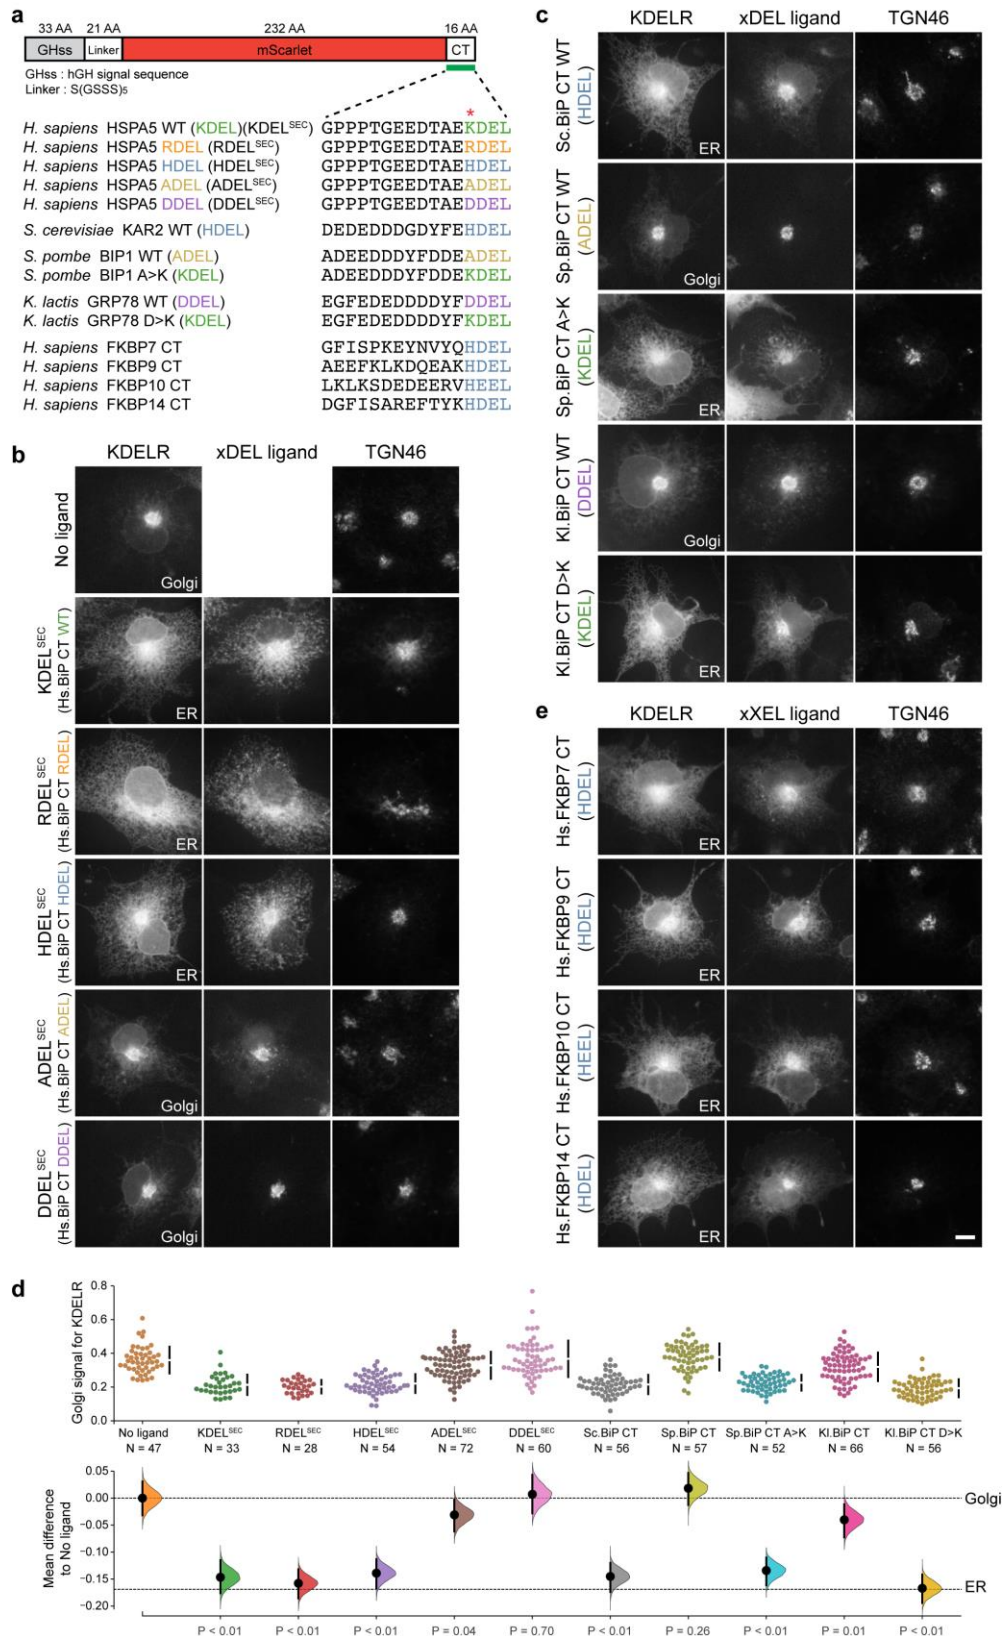

709

710 **Figure 5 – supplement 1. Comparison of human and yeast ER retrieval signals.**

711 **a.** Schematic of the ER retrieval construct showing the human growth hormone

712 signal sequence (hGHss), linker, mScarlet fluorescent protein, and 16 amino acid

713 extension carrying a C-terminal (CT) retrieval signal from known human and yeast  
714 ER proteins. A sequence alignment shows the conservation of the retrieval signal. **b.**  
715 WT KDEL receptor distribution was followed in the absence (-ligand) or presence of  
716 human BIP derived signals (K/R/H/A/DDEL<sup>sec</sup>). **c.** WT KDEL receptor distribution  
717 was followed in the absence (-ligand) or presence of yeast BIP derived signals  
718 K/R/HA/DDEL<sup>sec</sup>. **d.** The fraction of KDEL receptor localised to the Golgi was  
719 measured before (no ligand) and after challenge with the different retrieval signals  
720 tested in b. and c. Effect sizes are shown as the mean difference for retrieval signal  
721 comparisons against the shared -ligand control with sample sizes and p-values. **e.**  
722 WT KDEL receptor distribution was followed in the absence (-ligand) or presence of  
723 ER retrieval signals from human FKBP family proteins. In all image panels, TGN46  
724 was used as a Golgi marker and the scale bar is 10µm.

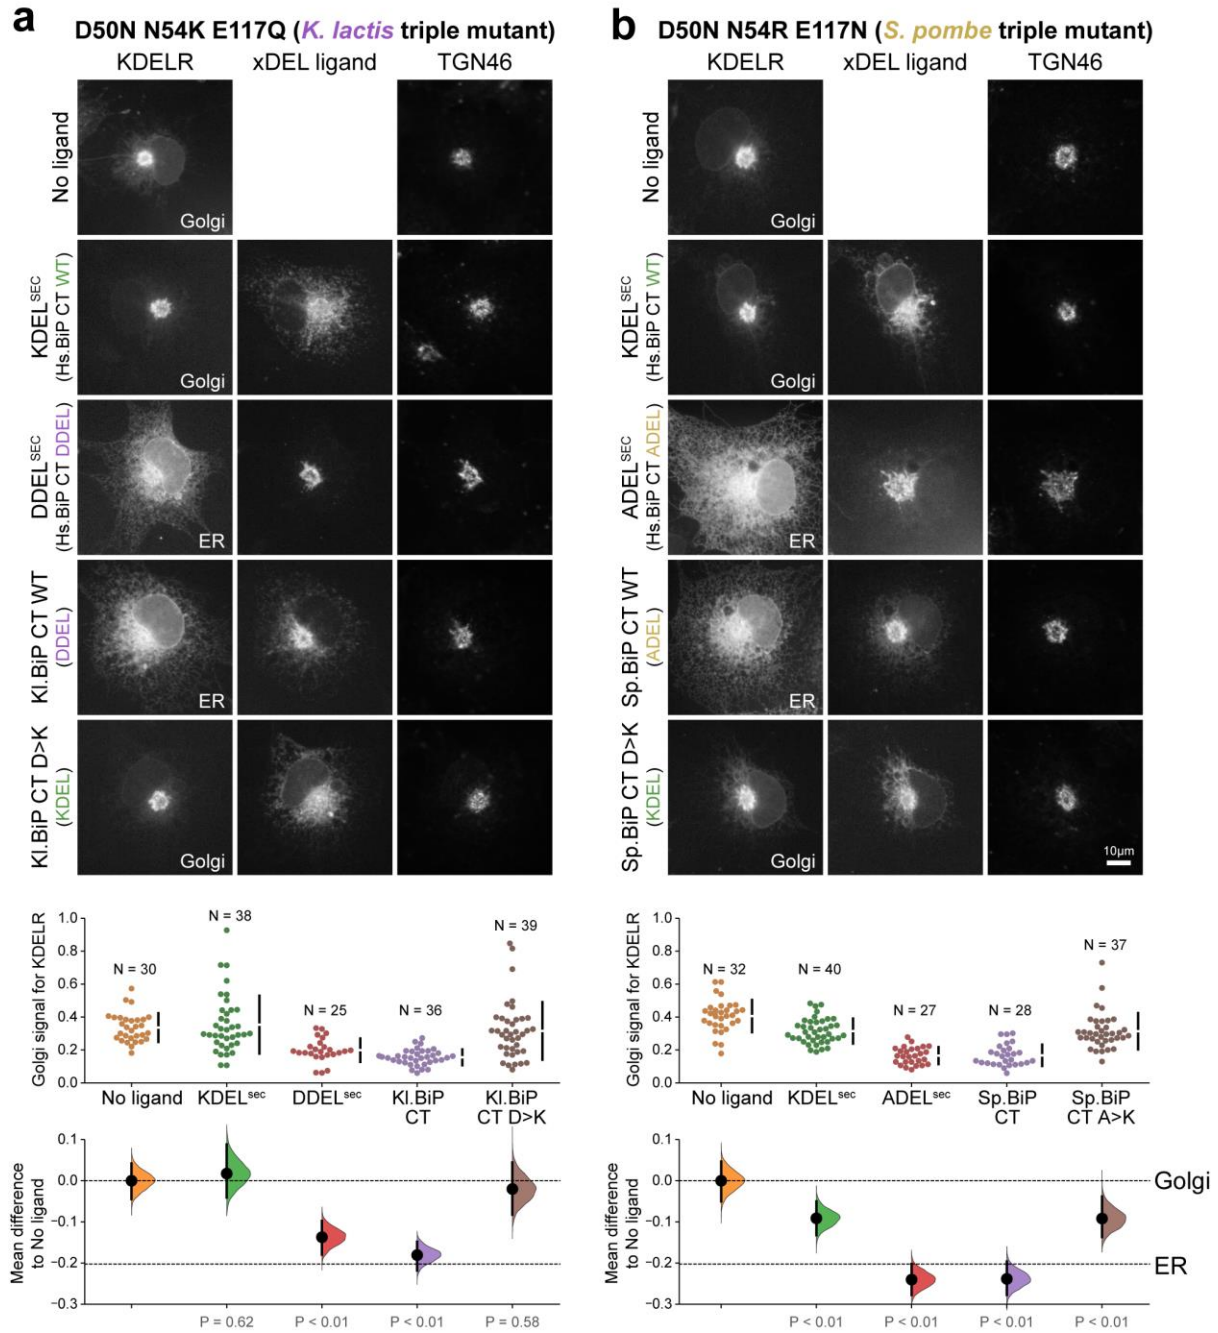

725

726 **Figure 6 – supplement 1. Retrieval specificity of “*K. lactis*” and “*S. pombe*”**

727 **triple mutant KDEL receptors. a.** Triple mutant “*K. lactis*” and **b.** “*S. pombe*”-like

728 KDEL receptors were tested for K/A/DDEL-induced redistribution from Golgi to ER.

729 KDEL receptor distribution was followed in the absence (-ligand) or presence of the

730 indicated ligands. TGN46 was used as a Golgi marker. Scale bar is 10µm. The

731 fraction of WT and mutant KDEL receptor localised to the Golgi was measured

732 before (no ligand) after challenge with different retrieval signals.

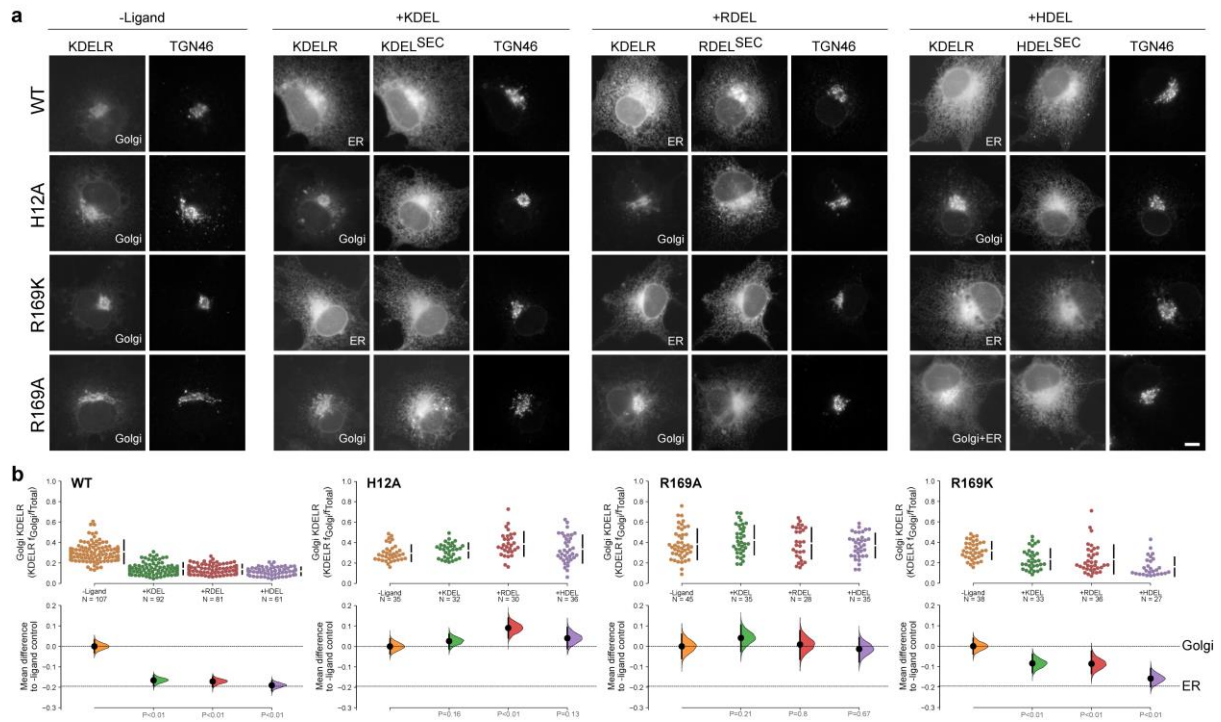

733

734 **Figure 7 – supplement 1. R169 plays a crucial role in signal recognition. a.**

735 Distribution of WT, H12A, R169A and R169K KDEL receptors was measured in the

736 absence (-ligand) or presence of K/R/HDEL (mScarlet-xDEL<sup>SEC</sup>). TGN46 was used

737 as a Golgi marker. Scale bar is 10µm. **b.** The raw data for the fraction of KDEL

738 receptor fluorescence in the Golgi is plotted on the upper axes with sample sizes,

739 with effect sizes shown in the lower graphs.

740

741 **MATERIALS & METHODS**

742 **RESOURCES TABLE**

| REAGENTS                                                                              | SOURCE                     | IDENTIFIER      |
|---------------------------------------------------------------------------------------|----------------------------|-----------------|
| <b>Antibodies</b>                                                                     |                            |                 |
| TGN46 sheep polyclonal antibody                                                       | Bio-rad (AbD Serotec)      | AHP500G         |
| GRP78 BiP rabbit polyclonal antibody                                                  | Abcam                      | ab21685         |
| PDI rabbit polyclonal antibody                                                        | ProteinTech                | #11245-1        |
| ERp72 rabbit monoclonal antibody                                                      | Cell Signalling Technology | #5033S          |
| ERp44 rabbit monoclonal antibody                                                      | Cell Signalling Technology | # 3798S         |
| KDEL receptor mouse monoclonal antibody                                               | Enzo Life Sciences         | ADI-VAA-PT048   |
| Donkey anti-Mouse IgG (H+L) Highly Cross-Adsorbed Secondary Antibody, Alexa Fluor 488 | Invitrogen                 | A-21202         |
| Donkey anti-Mouse IgG (H+L) Highly Cross-Adsorbed Secondary Antibody, Alexa Fluor 647 | Invitrogen                 | A-21448         |
| Peroxidase-AffiniPure Donkey Anti-Rabbit IgG (H+L)                                    | Jackson ImmunoResearch     | 711-035-152-JIR |
| Peroxidase-AffiniPure Donkey Anti-Mouse IgG (H+L)                                     | Jackson ImmunoResearch     | 711-035-152-JIR |
| Peroxidase-AffiniPure Donkey Anti-Sheep IgG (H+L)                                     | Jackson ImmunoResearch     | 713-035-147-JIR |
| <b>Bacterial and Yeast Strains</b>                                                    |                            |                 |
| XL1-Blue Competent Cells                                                              | Agilent Technologies       | 200249          |
| <i>Saccharomyces cerevisiae</i> Bj5460                                                | ATCC                       | 208285          |
| <b>Chemicals and Peptides</b>                                                         |                            |                 |
| Dulbecco's modified Eagle's medium                                                    | ThermoFisher Scientific    | 31966-047       |
| Fetal Bovine Serum                                                                    | Sigma                      | F9665           |
| TrypLE Express Enzyme                                                                 | ThermoFisher Scientific    | 12605036        |
| Opti-MEM                                                                              | ThermoFisher Scientific    | 11058021        |
| Mirus TransIT-LT1                                                                     | Mirus Bio LLC              | MIR 2306        |
| GE Healthcare Amersham ECL                                                            | GE Healthcare              | RPN2106         |
| Sodium phosphate monobasic (NaH <sub>2</sub> PO <sub>4</sub> )                        | Sigma                      | S8282           |
| Sodium phosphate dibasic (Na <sub>2</sub> HPO <sub>4</sub> )                          | Sigma                      | 71640           |
| Sodium periodate (NaIO <sub>4</sub> )                                                 | Sigma                      | 311448          |
| 16% Formaldehyde                                                                      | Thermo                     | 28908           |
| Saponin                                                                               | Sigma                      | S7900           |
| L-Lysine monohydrochloride                                                            | Sigma                      | 62929           |
| Mowiol 4-88                                                                           | Millipore                  | 475904          |
| Trichloroacetic acid                                                                  | Sigma                      | T6399           |
| DDM                                                                                   | Glycon                     | D97002-C        |
| CHS                                                                                   | Sigma                      | C6512           |
| Monoolein                                                                             | Sigma                      | M7765           |
| HisPur™                                                                               | Thermo Scientific          | 25214           |
| HisTrap HP                                                                            | Cytiva                     | 17-5248-01      |
| Superdex 200 Increase 10/300 GL                                                       | Cytiva                     | 28-9909-44      |
| Ultra-15 Centrifugal Filter Unit, 50,000 NMWC                                         | Amicon                     | UFC905024       |
| Yeast Drop Out media -Ura                                                             | Formedium                  | DCS0169         |
| Yeast Drop Out media -Leu                                                             | Merck                      | Y1376-20G       |
| Ultima Gold Scintillation Fluid                                                       | Perkin Elmer               | 6013326         |

|                                                                                                |                                 |                     |
|------------------------------------------------------------------------------------------------|---------------------------------|---------------------|
| 3H-TAEHDEL                                                                                     | Cambridge Research Biochemicals | 185 MBq 106 Ci/mmol |
| 3H-TAEKDEL                                                                                     | Cambridge Research Biochemicals | 185 MBq 128 Ci/mmol |
| TAEHDEL                                                                                        | Cambridge peptides              | custom synthesis    |
| TAEKDEL                                                                                        | Cambridge peptides              | custom synthesis    |
| TAERDEL                                                                                        | Cambridge peptides              | custom synthesis    |
| TAEDDEL                                                                                        | Cambridge peptides              | custom synthesis    |
| TAEKDELCOOH                                                                                    | Cambridge peptides              | custom synthesis    |
| TAEKDELCONH                                                                                    | Cambridge peptides              | custom synthesis    |
| TAEHDELCOOH                                                                                    | Cambridge peptides              | custom synthesis    |
| TAEHDELCONH                                                                                    | Cambridge peptides              | custom synthesis    |
|                                                                                                |                                 |                     |
| <b>Structures</b>                                                                              |                                 |                     |
| HDEL structure                                                                                 | This paper                      | 6Y7V                |
| RDEL structure                                                                                 | This paper                      | 6ZXR                |
|                                                                                                |                                 |                     |
| <b>Mammalian Cell Lines</b>                                                                    |                                 |                     |
| COS-7                                                                                          | ATCC                            | CRL-1651            |
| HeLa S3                                                                                        | ATCC                            | CCL-2.2             |
|                                                                                                |                                 |                     |
| <b>Plasmids</b>                                                                                |                                 |                     |
| pcDNA3.1 hGHss-mScarlet- <i>H. sapiens</i> BiP <sub>639-654</sub> (KDEL <sup>SEC</sup> )       | Bräuer et al. 2019              | pFB9692             |
| pcDNA3.1 hGHss-mScarlet- <i>H. sapiens</i> BiP <sub>639-654</sub> K651R (RDEL <sup>SEC</sup> ) | This paper                      | pFB9712             |
| pcDNA3.1 hGHss-mScarlet- <i>H. sapiens</i> BiP <sub>639-654</sub> K651H (HDEL <sup>SEC</sup> ) | This paper                      | pFB9713             |
| pcDNA3.1 hGHss-mScarlet- <i>H. sapiens</i> BiP <sub>639-654</sub> K651A (ADEL <sup>SEC</sup> ) | This paper                      | pFB9714             |
| pcDNA3.1 hGHss-mScarlet- <i>H. sapiens</i> BiP <sub>639-654</sub> K651D (DDEL <sup>SEC</sup> ) | This paper                      | pFB9715             |
| pcDNA3.1 hGHss-mScarlet- <i>S. cerevisiae</i> BiP <sub>667-682</sub>                           | This paper                      | pFB9716             |
| pcDNA3.1 hGHss-mScarlet- <i>S. pombe</i> BiP <sub>648-663</sub>                                | This paper                      | pFB9717             |
| pcDNA3.1 hGHss-mScarlet- <i>S. pombe</i> BiP <sub>648-663</sub> A660K                          | This paper                      | pFB9718             |
| pcDNA3.1 hGHss-mScarlet- <i>K. lactis</i> BiP <sub>664-679</sub>                               | This paper                      | pFB9719             |
| pcDNA3.1 hGHss-mScarlet- <i>K. lactis</i> BiP <sub>664-679</sub> D676K                         | This paper                      | pFB9720             |
| pcDNA3.1 hGHss-mScarlet- <i>H. sapiens</i> FKBP7 <sub>207-222</sub>                            | This paper                      | pFB9721             |
| pcDNA3.1 hGHss-mScarlet- <i>H. sapiens</i> FKBP9 <sub>555-570</sub>                            | This paper                      | pFB9722             |
| pcDNA3.1 hGHss-mScarlet- <i>H. sapiens</i> FKBP10 <sub>567-582</sub>                           | This paper                      | pFB9723             |
| pcDNA3.1 hGHss-mScarlet- <i>H. sapiens</i> FKBP14 <sub>196-211</sub>                           | This paper                      | pFB9724             |
| pEF5/FRT human KDELR1-GFP                                                                      | Bräuer et al. 2019              | pFB9693             |
| pEF5/FRT human KDELR1 H12A-GFP                                                                 | Bräuer et al. 2019              | pFB9694             |
| pEF5/FRT human KDELR1 D50N-GFP                                                                 | This paper                      | pFB9695             |
| pEF5/FRT human KDELR1 N54K-GFP                                                                 | This paper                      | pFB9696             |
| pEF5/FRT human KDELR1 E117Q-GFP                                                                | This paper                      | pFB9697             |
| pEF5/FRT human KDELR1 E117D-GFP                                                                | This paper                      | pFB9698             |
| pEF5/FRT human KDELR1 E117A-GFP                                                                | This paper                      | pFB9699             |
| pEF5/FRT human KDELR1 E117N-GFP                                                                | This paper                      | pFB9700             |
| pEF5/FRT human KDELR1 W120F-GFP                                                                | This paper                      | pFB9701             |
| pEF5/FRT human KDELR1 W120A-GFP                                                                | This paper                      | pFB9702             |
| pEF5/FRT human KDELR1 R169K-GFP                                                                | This paper                      | pFB9703             |
| pEF5/FRT human KDELR1 R169A-GFP                                                                | This paper                      | pFB9704             |

|                                                 |                        |                                                                                                                         |
|-------------------------------------------------|------------------------|-------------------------------------------------------------------------------------------------------------------------|
| pEF5/FRT human KDELR1 E117A/W120A-GFP           | This paper             | pFB9705                                                                                                                 |
| pEF5/FRT human KDELR1 D50N/N54K-GFP             | This paper             | pFB9706                                                                                                                 |
| pEF5/FRT human KDELR1 D50N/E117Q-GFP            | This paper             | pFB9707                                                                                                                 |
| pEF5/FRT human KDELR1 N54K/E117Q-GFP            | This paper             | pFB9708                                                                                                                 |
| pEF5/FRT human KDELR1 D50N/N54K/E117Q-GFP       | This paper             | pFB9709                                                                                                                 |
| pEF5/FRT human KDELR1 D50N/N54R/E117N-GFP       | This paper             | pFB9710                                                                                                                 |
| pEF5/FRT human KDELR1 D50N/N54K/E117Q/W120A-GFP | This paper             | pFB9711                                                                                                                 |
| pDDGFP-Leu2d-GgKDELR2                           | Addgene                | 123618                                                                                                                  |
| pDDGFP-Leu2d-GgKDELR2_H12A                      | This paper             | KDELR2_H12A                                                                                                             |
| pDDGFP-Leu2d-GgKDELR2_E117A                     | This paper             | KDELR2_E117A                                                                                                            |
| pDDGFP-Leu2d-GgKDELR2_E117D                     | This paper             | KDELR2_E117D                                                                                                            |
| pDDGFP-Leu2d-GgKDELR2_E117Q                     | This paper             | KDELR2_E117Q                                                                                                            |
| pDDGFP-Leu2d-GgKDELR2_E127A                     | This paper             | KDELR2_E127A                                                                                                            |
| pDDGFP-Leu2d-GgKDELR2_E127Q                     | This paper             | KDELR2_E127Q                                                                                                            |
| pDDGFP-Leu2d-GgKDELR2_W120A                     | This paper             | KDELR2_W120A                                                                                                            |
| pDDGFP-Leu2d-GgKDELR2_W120F                     | This paper             | KDELR2_W120F                                                                                                            |
| pDDGFP-Leu2d-GgKDELR2_R169A                     | This paper             | KDELR2_R169A                                                                                                            |
| pDDGFP-Leu2d-GgKDELR2_R169K                     | This paper             | KDELR2_R169K                                                                                                            |
| <b>Computer Software</b>                        |                        |                                                                                                                         |
| Metamorph 7.5                                   | Molecular Dynamics Inc | <a href="http://www.moleculardevices.com">www.moleculardevices.com</a>                                                  |
| Fiji 2.0.0-rc-49/1.52i                          | NIH Image              | <a href="http://fiji.sc/">http://fiji.sc/</a>                                                                           |
| Prism 7                                         | GraphPad Software      | <a href="http://www.graphpad.com">www.graphpad.com</a>                                                                  |
| Adobe Illustrator CS3 13.0.2                    | Adobe Systems Inc      | <a href="http://www.adobe.com">www.adobe.com</a>                                                                        |
| Adobe Photoshop CS3 10.0.1                      | Adobe Systems Inc      | <a href="http://www.adobe.com">www.adobe.com</a>                                                                        |
| Phenix (Afonine et al., 2018)                   | Phenix                 | <a href="https://www.phenix-online.org">https://www.phenix-online.org</a>                                               |
| COOT (Emsley and Cowtan, 2004)                  |                        | <a href="https://www2.mrc-lmb.cam.ac.uk/personal/pemsley/coot">https://www2.mrc-lmb.cam.ac.uk/personal/pemsley/coot</a> |
| PyMOL                                           | Schrodinger            | <a href="https://pymol.org/2">https://pymol.org/2</a>                                                                   |
| Buster                                          | Global Phasing         | <a href="https://www.globalphasing.com">https://www.globalphasing.com</a>                                               |
| <b>Other</b>                                    |                        |                                                                                                                         |
| TEV Protease                                    | Merck                  | T4455-10KU                                                                                                              |
| Tunair Flasks                                   | Sigma                  | Z710822-4EA                                                                                                             |

743

744 **Mammalian cell lines**

745 HeLa cells were cultured at 37°C and 5% CO<sub>2</sub> in DMEM containing 10% [vol/vol]

746 foetal bovine serum (Invitrogen). For passaging, cells were washed in PBS, and then

747 removed from the dish by incubation with TripLE Express (Thermo Fisher Scientific).

748

749 **ER retrieval and secretion assays**

750 *Homo sapiens* KDELR1 (Uniprot: P24390) was cloned into the pEF5/FRT low level  
751 mammalian expression vector with a C-terminal 20 amino acid linker made up of 5  
752 copies of Gly-Ser-Ser-Ser followed by GFP to create KDELR-GFP. Specific point  
753 mutations in the ligand binding site, described in the figures, were introduced using  
754 the Quickchange protocol (Stratagene). To create the mScarlet-KDEL<sup>sec</sup> ligand  
755 construct, mScarlet with the N-terminal hGH signal peptide and the 16 C-terminal  
756 residues of human BiP at its C-terminus, containing the KDEL signal, was cloned  
757 into the pcDNA3.1 vector. This was modified using site-directed mutagenesis or  
758 annealed oligo ligation to create C-terminal retrieval signal variants from known  
759 human and yeast ER proteins. COS-7 cells were grown on 10 mm diameter 0.16-  
760 0.19 mm thick glass coverslips in DMEM containing 10% [vol/vol] bovine calf serum  
761 at 37°C and 5% CO<sub>2</sub>. Cells were plated at 50,000 cells per well of a 6-well plate,  
762 each well containing 2 coverslips. For ER retrieval assays, the cells were transfected  
763 after 24 h with 0.25 µg KDELR-GFP and 0.5 µg mScarlet-ligand (+ xDEL ligand) or  
764 0.25 µg KDELR-GFP and 0.5 µg pcDNA3.1 (- ligand) diluted in 100µl Optimem and  
765 3 µl Mirus LT1 (Mirus Bio LLC). After a further 18 h, cells were washed twice with 2  
766 mL of PBS, then fixed for 2 h in 2 mL 2% wt/vol) formaldehyde in 87.5 mM lysine,  
767 87.5 mM sodium phosphate pH 7.4, and 10 mM sodium periodate. Subsequently,  
768 coverslips were washed three times in 2 mL permeabilization solution 100 mM  
769 sodium phosphate pH 7.4, then permeabilised in 1 mg mL<sup>-1</sup> BSA, 0.12 mg mL<sup>-1</sup>  
770 saponin, and 100 mM sodium phosphate pH 7.4 for 30 min. Primary and secondary  
771 antibody staining was performed for 60 min in permeabilization solution at 22°C.  
772 Commercially available antibodies were used to detect the Golgi protein TGN46  
773 (sheep; AbD Serotec). Coverslips were mounted on glass slides in Mowiol 4-88 and



774 imaged with a 60×/1.35 NA oil immersion objective on an Olympus BX61 upright  
775 microscope (with filtersets for DAPI, GFP/Alexa-488, -555, -568, and -647 (Chroma  
776 Technology Corp.), a 2048x2048 pixel CMOS camera (PrimΣ; Photometrics), and  
777 MetaMorph 7.5 imaging software (Molecular Dynamics Inc.). Illumination was  
778 provided by a wLS LED illumination unit (QImaging). Image stacks of 3-5 planes with  
779 0.3 μm spacing through the ER and Golgi were taken. The image stacks were then  
780 maximum intensity projected and the selected channels merged to create 24-bit  
781 RGB TIFF files in MetaMorph. To produce the figures, images in 24-bit RGB format  
782 were cropped in Photoshop to show individual cells and then placed into Illustrator  
783 (Adobe Systems Inc.). To determine ER retrieval efficiency, the Golgi signal  
784 (integrated pixel intensity) for the KDEL receptor was measured (Schindelin et al.,  
785 2012) in the region defined by the Golgi marker antibody in the presence (+) and  
786 absence (-) of ligand. Golgi signal was normalised to the ER signal, to account for  
787 different expression levels.

788 For ER secretion assays, upon transfection HeLa S3 cells were allowed to  
789 express the proteins for 24 h. The media were TCA precipitated and both cell and  
790 media were resuspended and boiled in SDS-PAGE sample buffer. All samples were  
791 analysed by Western blotting for xDEL ligand, resident ER chaperones BIP (rabbit  
792 #ab21685, Abcam), PDI (rabbit #11245-1, ProteinTech), ERP72 (rabbit #5033S, Cell  
793 Signalling Technology), ERP44 (rabbit #3798S, Cell Signalling Technology) and the  
794 KDEL receptor (mouse ADI-VAA-PT048, Enzo Life Sciences).

795

## 796 **Statistical analysis of ER retrieval and secretion**

797 To estimate the effect sizes and significance of receptor mutations for ligand-  
798 mediated ER retrieval, data was analysed in R using the open-source package

799 dabestr (Ho et al., 2019; Team, 2017; Wickham, 2010). Data are presented as  
800 Cumming estimation plots, where the raw data is plotted on the upper axes and  
801 mean differences are plotted as bootstrap sampling distributions on the lower axes  
802 for 5000 bootstrap samples. Each mean difference is depicted as a dot. Each 95%  
803 confidence interval is indicated by the ends of the vertical error bars; the confidence  
804 interval is bias-corrected and accelerated. The p values reported are the likelihood of  
805 observing the effect size, if the null hypothesis of zero difference is true. For each  
806 permutation p value, 5000 reshuffles of the control and test labels were performed.

807

### 808 **KDEL receptor crystallisation and structure determination**

809 Gg KDELR2 was expressed and purified as described previously (Bräuer et al.,  
810 2019), concentrated to 14.5 mg mL<sup>-1</sup> and incubated with 6.4 mM TAEHDEL peptide  
811 on ice for one hour prior to crystallisation. Crystals were set up at 20 °C as above  
812 using precipitant 30% (v/v) PEG 600, 100 mM MES pH 6.0, 100 mM Sodium Nitrate.  
813 Phases were determined via molecular replacement using Phaser and employing  
814 PDB:6I6H as the search model with the TAEKDEL peptide removed from the search  
815 model. The TAEHDEL peptide was built into difference density using Coot (Emsley  
816 et al., 2010), followed by refinement in BUSTER (Blanc et al., 2004).

817

### 818 **Retrieval signal binding assays**

819 Binding assays were performed in 20 mM MES pH 5.4, 40 mM Sodium Chloride,  
820 0.01% DDM 0.0005% CHS unless stated otherwise. 5 µL of <sup>3</sup>H-TAEK/HDEL  
821 (Cambridge peptides, UK) at 20 nM was incubated with 5 µL of Gg KDELR or  
822 variants thereof at the desired concentration at 20 °C for 10 min. The reaction was  
823 then filtered through a 0.22 µm mixed cellulose ester filters (Millipore, USA) using a  
824 vacuum manifold. Filters were then washed with 2 x 500 µL buffer. The amount of

825 peptide remaining bound was measured using scintillation counting in Ultima Gold  
826 (Perkin Elmer). Experiments were performed a minimum of three times to generate  
827 an overall mean and standard deviation. Data was normalised to the maximal  
828 binding at pH 5.4 and fit with a four-parameter logistic non-linear regression model.

829

### 830 **Relative binding free energy calculations**

831 To compute the free energy of the deprotonation of the histidine or lysine and the  
832 mutation of lysine to histidine, molecular mechanics based alchemical transformation  
833 was performed. The free energy difference was taken as the difference in the free  
834 energy of the transformation between the protein-peptide complex and the peptide in  
835 solution. The KDEL receptor in the protein-peptide complex was taken from the  
836 crystal structure (KDEL: 6I6B (Bräuer et al., 2019); HDEL: 6Y7V). The C-terminus of  
837 the receptor was modelled to full length using Modeller 9.21 (Webb and Sali, 2016);  
838 100 models were created and the one with the best DOPE score was selected (Shen  
839 and Sali, 2006). The protein was then embedded into a lipid membrane containing  
840 186 DMPC lipids using the procedure described by us previously (Wu et al., 2019).  
841 The system of peptide in solution was constructed by taking the coordinates of the  
842 peptide from the crystal structure and placing in a box, where the box edge was at  
843 least 2 nm from the peptide. Both systems were solvated and neutralised to final salt  
844 concentration of 150 mM NaCl. For the deprotonation calculations, the change in  
845 charge in the system was counteracted by simultaneously charging a sodium ion in  
846 the corner of the box (ie at the start of the process the charge was zero and by the  
847 end it was +1). To minimise the interactions between the histidine (or lysine) and  
848 this alchemical sodium ion, the histidine/lysine residues were restrained to the centre  
849 of the box via their C $\alpha$  atom using a harmonic restraint of 1000 kJ/mol/nm and the

850 alchemical sodium ion was either restrained to the edge of the box for the peptide in  
851 solution or restrained to the z-axis in the case of the peptide-protein complex.

852 The Amber ff14SB force field (Maier et al., 2015) was used to describe the  
853 protein and alchemical transformation was done with pmx (Gapsys et al., 2015).  
854 Lipids were described by LIPID17, which was ported from amber to Gromacs by us  
855 (Wu and Biggin (2020). GMX\_lipid17.ff: Gromacs Port of the amber LIPID17 force  
856 field. Zenodo. <http://doi.org/10.5281/zenodo.3610470>). The simulations were run  
857 with GROMACS 2018 (Abraham et al., 2015). The simulation input parameters were  
858 set according to recommendations suggested by pmx. Since the equilibrium method  
859 was used, the sc-alpha and sc-sigma parameters were set to 0.5 and 0.3  
860 respectively. For the lysine to histidine transformation, a total of 21 lambda windows  
861 with 0.05 equal spacing were used to transform the charge and the vdw parameters  
862 at the same time. A soft-core potential was used for the coulombic interactions to  
863 avoid singularity effects. For the deprotonation calculations, 11 equally spaced  
864 windows were used to change the partial charge and an addition window was used  
865 to complete the transformation. After energy minimisation, each window was run for  
866 200 ps in the NVT ensemble and 1 ns in an NPT ensemble with position restraints of  
867 1000 kJ/mol to reach a final temperature of 310 K and 1 bar. 30 ns production runs  
868 with replicate exchanges at intervals of 1 ps were then performed. Data were  
869 analysed using the Multistate Bennett Acceptance Ratio with alchemical analysis  
870 with the first 5 ns discarded (Klimovich et al., 2015). For each transformation, three  
871 replicates were performed and the result was given as the mean and standard  
872 deviation. For the LYS/HIP transformation, since both HDEL-bound and KDEL-  
873 bound structure were available, six simulations (three starting from KDEL-bound  
874 structure and three from HDEL-bound structure) were used to produce the results.

875 To compute the free energy difference of KDEL to HDEL transformation, the  
 876 total free energy difference of alchemically changing KDEL to HDEL is computed as

$$\Delta G_{KDEL \rightarrow HDEL} = \Delta G_{LYS \rightarrow LYS/N} + \Delta G_{LYS \rightarrow HIP} - \Delta G_{HIP \rightarrow HIP/D/E}$$

877 Where  $\Delta G_{HIP \rightarrow LYS}$  is the free energy difference of converting KDEL to HDEL when  
 878 both lysine and histidine are in the protonated form.  $\Delta G_{HIP \rightarrow HIP/D/E}$  and  $\Delta G_{LYS \rightarrow LYS/N}$  is  
 879 the free energy of converting protonated histidine or lysine from the protonated to an  
 880 ensemble of protonated and deprotonated forms (for example we might calculate the  
 881 energy to go from 100% protonated to an ensemble of 40% protonated and 60%  
 882 deprotonated):

$$\Delta G_{LYS \rightarrow LYS/N} = w_{LYS}0 + w_{LYN}(\Delta G_{LYS \rightarrow LYN} - \Delta G_{LYS_{offset}}) - T\Delta S$$

$$\Delta G_{HIP \rightarrow HIP/D/E}$$

$$= w_{HIP}0 + w_{HID}(\Delta G_{HIP \rightarrow HID} - \Delta G_{HIP_{offset}}) + w_{HIE}(\Delta G_{HIP \rightarrow HIE} - \Delta G_{HIP_{offset}}) - T\Delta S$$

883 The  $\Delta G_{HIP_{offset}}$  and  $\Delta G_{LYS_{offset}}$  are terms to calibrate the computational protonation  
 884 free energy to the experimental microscopic pka (histidine: 6.0; lysine: 8.95) and  
 885 were defined as:

$$\Delta G_{offset} = 2.303RT \times (7.0 - pka)$$

886  $w$  is the Boltzmann weight of each protonation state and is computed as:

$$w = \frac{e^{\frac{-\Delta G}{RT}}}{\sum e^{\frac{-\Delta G}{RT}}}$$

887 and  $\Delta S$  is the configurational entropy and is defined as:

$$\Delta S = -R \sum w \ln w$$

888

## 889 **Quantum mechanical calculations for the effect of HDEL protonation**

890 To explore the interactions between the signal and receptor, the histidine of the  
891 HDEL signal and tyrosine (W120) of the receptor were taken from the crystal  
892 structure and capped at both ends (with acetyl and amide groups the N and C-  
893 termini respectively). The hydrogens were added to the complex and the three  
894 different protonation states of the histidine were constructed with Maestro 2019.2.  
895 The capped three amino acid complex were geometry minimised with non-hydrogen  
896 atoms constrained at the RI-B3LYP-D3(BJ)/def2-TZVP theory level with geometry  
897 counterpoise (Grimme et al., 2010; Grimme et al., 2011; Kruse and Grimme, 2012;  
898 Weigend, 2006; Weigend and Ahlrichs, 2005) using ORCA 4.2.0 (Neese, 2012). The  
899 interactions between the three different protonation states of the histidine and W120  
900 were computed at the SAPT2+/jun-cc-pVDZ (Parker et al., 2014) theory level from  
901 the geometry optimised structure using psi4 1.3.2 (Parrish et al., 2017).

902

## 903 **Simulation of signal engagement with the binding site**

904 To obtain a converged view of how the KDEL peptide enters the KDEL receptor,  
905 umbrella sampling was used to enhance the sampling of the behaviour of the C-  
906 terminus in the binding pocket. The initial frames were generated by pulling the N-  
907 terminus of the KDEL peptide out of the binding pocket using a moving restraint  
908 (Gromacs 2019.4/plumed 2.6.0) (consortium, 2019). The collective variable (CV) was  
909 defined as the distance between the N-terminus of the KDEL peptide (N atom) and  
910 the centre of the binding pocket, which was defined as the centre of the C $\alpha$  atoms of  
911 residue 9, 44, 64, 124 and 162. Pulling was performed using a CV=1.8 nm to 3.3 nm  
912 with a restraint strength of 1000 kcal/mol/nm for 100 ns. To prevent the complete  
913 dissociation of the peptide from the receptor, a one-side distance restraint was

914 applied on the distance between the C-terminus of the peptide (atom C) and the  
915 binding pocket at 1.7 nm with a strength of 1000 kJ/mol/nm. Sixteen windows were  
916 set up where the CV was varied from 1.8 nm to 3.3 nm with a step of 0.1 nm and  
917 were run for 500 ns. The results were analysed with MDAnalysis 1.0  
918 ([https://conference.scipy.org/proceedings/scipy2016/oliver\\_beckstein.html](https://conference.scipy.org/proceedings/scipy2016/oliver_beckstein.html)).

919

## 920 **Quantification and statistical analysis**

921 Details of the number of experimental repeats, numbers of cells analysed and the  
922 relevant statistics are detailed in the figure legends and specific method details.

923

924 **References**

- 925 Abraham, M.J., Murtola, T., Schulz, R., Páll, S., Smith, J.C., Hess, B., and Lindahl,  
926 E. (2015). GROMACS: High performance molecular simulations through multi-level  
927 parallelism from laptops to supercomputers. *SoftwareX* 1-2, 19-25.
- 928 Alanen, H.I., Raykhel, I.B., Luukas, M.J., Salo, K.E., and Ruddock, L.W. (2011).  
929 Beyond KDEL: the role of positions 5 and 6 in determining ER localization. *J Mol Biol*  
930 409, 291-297.
- 931 Barlowe, C. (2003). Signals for COPII-dependent export from the ER: what's the  
932 ticket out? *Trends Cell Biol* 13, 295-300.
- 933 Blanc, E., Roversi, P., Vonrhein, C., Flensburg, C., Lea, S.M., and Bricogne, G.  
934 (2004). Refinement of severely incomplete structures with maximum likelihood in  
935 BUSTER-TNT. *Acta Crystallographica Section D Biological Crystallography* 60,  
936 2210-2221.
- 937 Bräuer, P., Parker, J.L., Gerondopoulos, A., Zimmermann, I., Seeger, M.A., Barr,  
938 F.A., and Newstead, S. (2019). Structural basis for pH-dependent retrieval of ER  
939 proteins from the Golgi by the KDEL receptor. *Science* 363, 1103-1107.
- 940 Cheng, Y., and Prusoff, W.H. (1973). Relationship between the inhibition constant  
941 (K<sub>1</sub>) and the concentration of inhibitor which causes 50 per cent inhibition (I<sub>50</sub>) of an  
942 enzymatic reaction. *Biochem Pharmacol* 22, 3099-3108.
- 943 consortium, P. (2019). Promoting transparency and reproducibility in enhanced  
944 molecular simulations. *Nat Methods* 16, 670-673.
- 945 Cundell, M.J., Hutter, L.H., Nunes Bastos, R., Poser, E., Holder, J., Mohammed, S.,  
946 Novak, B., and Barr, F.A. (2016). A PP2A-B55 recognition signal controls substrate  
947 dephosphorylation kinetics during mitotic exit. *J Cell Biol* 214, 539-554.
- 948 Dancourt, J., and Barlowe, C. (2010). Protein sorting receptors in the early secretory  
949 pathway. *Annu Rev Biochem* 79, 777-802.
- 950 Dean, N., and Pelham, H.R. (1990). Recycling of proteins from the Golgi  
951 compartment to the ER in yeast. *J Cell Biol* 111, 369-377.
- 952 Dougherty, D.A. (1996). Cation- $\pi$  interactions in chemistry and biology: a new view  
953 of benzene, Phe, Tyr, and Trp. *Science* 271, 163-168.
- 954 Ellgaard, L., and Helenius, A. (2003). Quality control in the endoplasmic reticulum.  
955 *Nat Rev Mol Cell Biol* 4, 181-191.
- 956 Emsley, P., Lohkamp, B., Scott, W.G., and Cowtan, K. (2010). Features and  
957 development of Coot. *Acta Crystallographica Section D Biological Crystallography*  
958 66, 486-501.
- 959 Gapsys, V., Michielssens, S., Seeliger, D., and de Groot, B.L. (2015). pmx:  
960 Automated protein structure and topology generation for alchemical perturbations.  
961 *Journal of Computational Chemistry* 36, 348-354.



- 962 Gomez-Navarro, N., and Miller, E. (2016). Protein sorting at the ER-Golgi interface. *J*  
963 *Cell Biol* 215, 769-778.
- 964 Grimme, S., Antony, J., Ehrlich, S., and Krieg, H. (2010). A consistent and accurate  
965 ab initio parametrization of density functional dispersion correction (DFT-D) for the  
966 94 elements H-Pu. *The Journal of Chemical Physics* 132, 154104.
- 967 Grimme, S., Ehrlich, S., and Goerigk, L. (2011). Effect of the damping function in  
968 dispersion corrected density functional theory. *Journal of Computational Chemistry*  
969 32, 1456-1465.
- 970 Ho, J., Tumkaya, T., Aryal, S., Choi, H., and Claridge-Chang, A. (2019). Moving  
971 beyond P values: data analysis with estimation graphics. *Nat Methods* 16, 565-566.
- 972 Itzhak, D.N., Davies, C., Tyanova, S., Mishra, A., Williamson, J., Antrobus, R., Cox,  
973 J., Weekes, M.P., and Borner, G.H.H. (2017). A Mass Spectrometry-Based  
974 Approach for Mapping Protein Subcellular Localization Reveals the Spatial Proteome  
975 of Mouse Primary Neurons. *Cell Rep* 20, 2706-2718.
- 976 Itzhak, D.N., Tyanova, S., Cox, J., and Borner, G.H. (2016). Global, quantitative and  
977 dynamic mapping of protein subcellular localization. *Elife* 5.
- 978 Klimovich, P.V., Shirts, M.R., and Mobley, D.L. (2015). Guidelines for the analysis of  
979 free energy calculations. *Journal of Computer-Aided Molecular Design* 29, 397-411.
- 980 Kruse, H., and Grimme, S. (2012). A geometrical correction for the inter- and intra-  
981 molecular basis set superposition error in Hartree-Fock and density functional theory  
982 calculations for large systems. *The Journal of Chemical Physics* 136, 154101.
- 983 Lewis, M.J., and Pelham, H.R. (1992). Ligand-induced redistribution of a human  
984 KDEL receptor from the Golgi complex to the endoplasmic reticulum. *Cell* 68, 353-  
985 364.
- 986 Lewis, M.J., Sweet, D.J., and Pelham, H.R. (1990). The ERD2 gene determines the  
987 specificity of the luminal ER protein retention system. *Cell* 61, 1359-1363.
- 988 Liao, S.M., Du, Q.S., Meng, J.Z., Pang, Z.W., and Huang, R.B. (2013). The multiple  
989 roles of histidine in protein interactions. *Chem Cent J* 7, 44.
- 990 Maier, J.A., Martinez, C., Kasavajhala, K., Wickstrom, L., Hauser, K.E., and  
991 Simmerling, C. (2015). ff14SB: Improving the Accuracy of Protein Side Chain and  
992 Backbone Parameters from ff99SB. *Journal of Chemical Theory and Computation*  
993 11, 3696-3713.
- 994 Munro, S., and Pelham, H.R. (1987). A C-terminal signal prevents secretion of  
995 luminal ER proteins. *Cell* 48, 899-907.
- 996 Neese, F. (2012). The ORCA program system. *WIREs Computational Molecular*  
997 *Science* 2, 73-78.
- 998 Newstead, S., and Barr, F. (2020). Molecular basis for KDEL-mediated retrieval of  
999 escaped ER-resident proteins - SWEET talking the COPs. *J Cell Sci* 133.

- 1000 Okada, A., Miura, T., and Takeuchi, H. (2001). Protonation of histidine and histidine-  
1001 tryptophan interaction in the activation of the M2 ion channel from influenza a virus.  
1002 *Biochemistry* *40*, 6053-6060.
- 1003 Parker, T.M., Burns, L.A., Parrish, R.M., Ryno, A.G., and Sherrill, C.D. (2014).  
1004 Levels of symmetry adapted perturbation theory (SAPT). I. Efficiency and  
1005 performance for interaction energies. *The Journal of Chemical Physics* *140*, 094106.
- 1006 Parrish, R.M., Burns, L.A., Smith, D.G.A., Simmonett, A.C., DePrince, A.E., 3rd,  
1007 Hohenstein, E.G., Bozkaya, U., Sokolov, A.Y., Di Remigio, R., Richard, R.M., *et al.*  
1008 (2017). Psi4 1.1: An Open-Source Electronic Structure Program Emphasizing  
1009 Automation, Advanced Libraries, and Interoperability. *J Chem Theory Comput* *13*,  
1010 3185-3197.
- 1011 Pidoux, A.L., and Armstrong, J. (1992). Analysis of the BiP gene and identification of  
1012 an ER retention signal in *Schizosaccharomyces pombe*. *EMBO J* *11*, 1583-1591.
- 1013 Raykhel, I., Alanen, H., Salo, K., Jurvansuu, J., Nguyen, V.D., Latva-Ranta, M., and  
1014 Ruddock, L. (2007). A molecular specificity code for the three mammalian KDEL  
1015 receptors. *J Cell Biol* *179*, 1193-1204.
- 1016 Scheel, A.A., and Pelham, H.R. (1998). Identification of amino acids in the binding  
1017 pocket of the human KDEL receptor. *The Journal of biological chemistry* *273*, 2467-  
1018 2472.
- 1019 Schindelin, J., Arganda-Carreras, I., Frise, E., Kaynig, V., Longair, M., Pietzsch, T.,  
1020 Preibisch, S., Rueden, C., Saalfeld, S., Schmid, B., *et al.* (2012). Fiji: an open-source  
1021 platform for biological-image analysis. *Nat Methods* *9*, 676-682.
- 1022 Schreiber, G., and Fersht, A.R. (1996). Rapid, electrostatically assisted association  
1023 of proteins. *Nat Struct Biol* *3*, 427-431.
- 1024 Semenza, J.C., Hardwick, K.G., Dean, N., and Pelham, H.R. (1990). ERD2, a yeast  
1025 gene required for the receptor-mediated retrieval of luminal ER proteins from the  
1026 secretory pathway. *Cell* *61*, 1349-1357.
- 1027 Semenza, J.C., and Pelham, H.R. (1992). Changing the specificity of the sorting  
1028 receptor for luminal endoplasmic reticulum proteins. *J Mol Biol* *224*, 1-5.
- 1029 Shen, M.Y., and Sali, A. (2006). Statistical potential for assessment and prediction of  
1030 protein structures. *Protein Sci* *15*, 2507-2524.
- 1031 Team, R.C. (2017). A language and environment for statistical computing. R  
1032 Foundation for Statistical  
1033 Computing.
- 1034 Townsley, F.M., Wilson, D.W., and Pelham, H.R. (1993). Mutational analysis of the  
1035 human KDEL receptor: distinct structural requirements for Golgi retention, ligand  
1036 binding and retrograde transport. *Embo j* *12*, 2821-2829.
- 1037 Webb, B., and Sali, A. (2016). Comparative Protein Structure Modeling Using  
1038 MODELLER. *Curr Protoc Bioinformatics* *54*, 5.6.1-5.6.37.

- 1039 Weigend, F. (2006). Accurate Coulomb-fitting basis sets for H to Rn. *Physical*  
1040 *Chemistry Chemical Physics* 8, 1057-1065.
- 1041 Weigend, F., and Ahlrichs, R. (2005). Balanced basis sets of split valence, triple zeta  
1042 valence and quadruple zeta valence quality for H to Rn: Design and assessment of  
1043 accuracy. *Physical Chemistry Chemical Physics* 7, 3297-3305.
- 1044 Wickham, H. (2010). *ggplot2: Elegant Graphics for Data Analysis* (Springer).
- 1045 Wilson, D.W., Lewis, M.J., and Pelham, H.R. (1993). pH-dependent binding of KDEL  
1046 to its receptor in vitro. *The Journal of biological chemistry* 268, 7465-7468.
- 1047 Wu, Z., Alibay, I., Newstead, S., and Biggin, P.C. (2019). Proton Control of  
1048 Transitions in an Amino Acid Transporter. *Biophysical Journal* 117, 1342-1351.
- 1049 Zagouras, P., and Rose, J.K. (1989). Carboxy-terminal SEKDEL sequences retard  
1050 but do not retain two secretory proteins in the endoplasmic reticulum. *J Cell Biol* 109,  
1051 2633-2640.  
1052
